# Supplementary material for: Catalytic system having an organotellurium ligand on graphene oxide: immobilization of Pd(0) nanoparticles and application in heterogeneous catalysis of cross-coupling reactions
Source: Royal Society of Chemistry journal article supplement (doi:10.1039/d4ra03401e), 2024-01-01
Supplement: d4ra03401e1.pdf [file d4ra03401e1.pdf]

**Electronic Supplementary Material (ESI)**

*for*

**Catalytic system having organotellurium ligand on  
graphene oxide: immobilization of Pd(0) nanoparticles  
and application in heterogeneous catalysis of cross-  
coupling reactions**

Suraj Purohit,<sup>a</sup> Preeti Oswal,<sup>a</sup> Anurag Bahuguna,<sup>a</sup> Anupma Tyagi,<sup>a</sup> Neeraj Bhatt,<sup>a</sup> and Arun  
Kumar<sup>a\*</sup>

<sup>a</sup>*Department of Chemistry, School of Physical Sciences, Doon University, Dehradun-248001,  
India*

*Corresponding author: Arun Kumar, E-mail: [arunkaushik@gmail.com](mailto:arunkaushik@gmail.com),  
[akumar.ch@doonuniversity.ac.in](mailto:akumar.ch@doonuniversity.ac.in)*

## Table of Contents

| Figures                                                                                                                                                  | Tables                                                              |
|----------------------------------------------------------------------------------------------------------------------------------------------------------|---------------------------------------------------------------------|
| <b>Fig. S1.</b> Area under SEM-EDS analysis for graphene oxide (GO)                                                                                      | <b>Table S1.</b> EDS analysis of graphene oxide (GO)                |
| <b>Fig. S2.</b> EDS data (composition plot) of graphene oxide (GO)                                                                                       | <b>Table S2.</b> EDS analysis of GO–TeN–Pd(0)nanocatalyst           |
| <b>Fig. S3.</b> Area under SEM-EDS analysis for GO-TeN-Pd(0)                                                                                             | <b>Table S3.</b> EDS analysis of recycled GO-TeN-Pd(0) nanocatalyst |
| <b>Fig. S4.</b> EDS data (composition plot) for GO-TeN-Pd(0)                                                                                             |                                                                     |
| <b>Fig. S5.</b> FT–IR spectra of graphene oxide (GO)                                                                                                     |                                                                     |
| <b>Fig. S6.</b> FT–IR spectra of GO–COOH                                                                                                                 |                                                                     |
| <b>Fig. S7.</b> FT–IR spectra of GO–TeN                                                                                                                  |                                                                     |
| <b>Fig. S8.</b> FT–IR spectra of GO–TeN–Pd(0)                                                                                                            |                                                                     |
| <b>Fig. S9.</b> Low-loss EELS spectra of graphene oxide (GO)                                                                                             |                                                                     |
| <b>Fig. S10.</b> Carbon K-edge (a1, a2) EELS spectra of graphene oxide (GO)                                                                              |                                                                     |
| <b>Fig. S11.</b> Oxygen K-edge (b1, b2) EELS spectra of graphene oxide (GO)                                                                              |                                                                     |
| <b>Fig. S12.</b> SEM-EDS (elemental mapping) layered view of recycled GO-TeN-Pd(0) nanocatalyst                                                          |                                                                     |
| <b>Fig. S13.</b> SEM-EDS (elemental mapping) of (a) carbon (b) nitrogen (c) oxygen (d) tellurium and (e) palladium of recycled GO-TeN-Pd(0) nanocatalyst |                                                                     |
| <b>Fig S14.</b> SEM-EDS data (composition plot) of recycled GO-TeN-Pd(0) nanocatalyst                                                                    |                                                                     |
| <b>Fig S15 – S44.</b> NMR spectra of Suzuki-Miyaura coupling products                                                                                    |                                                                     |
| <b>Fig S45 – S56.</b> NMR spectra of C-O coupling products                                                                                               |                                                                     |

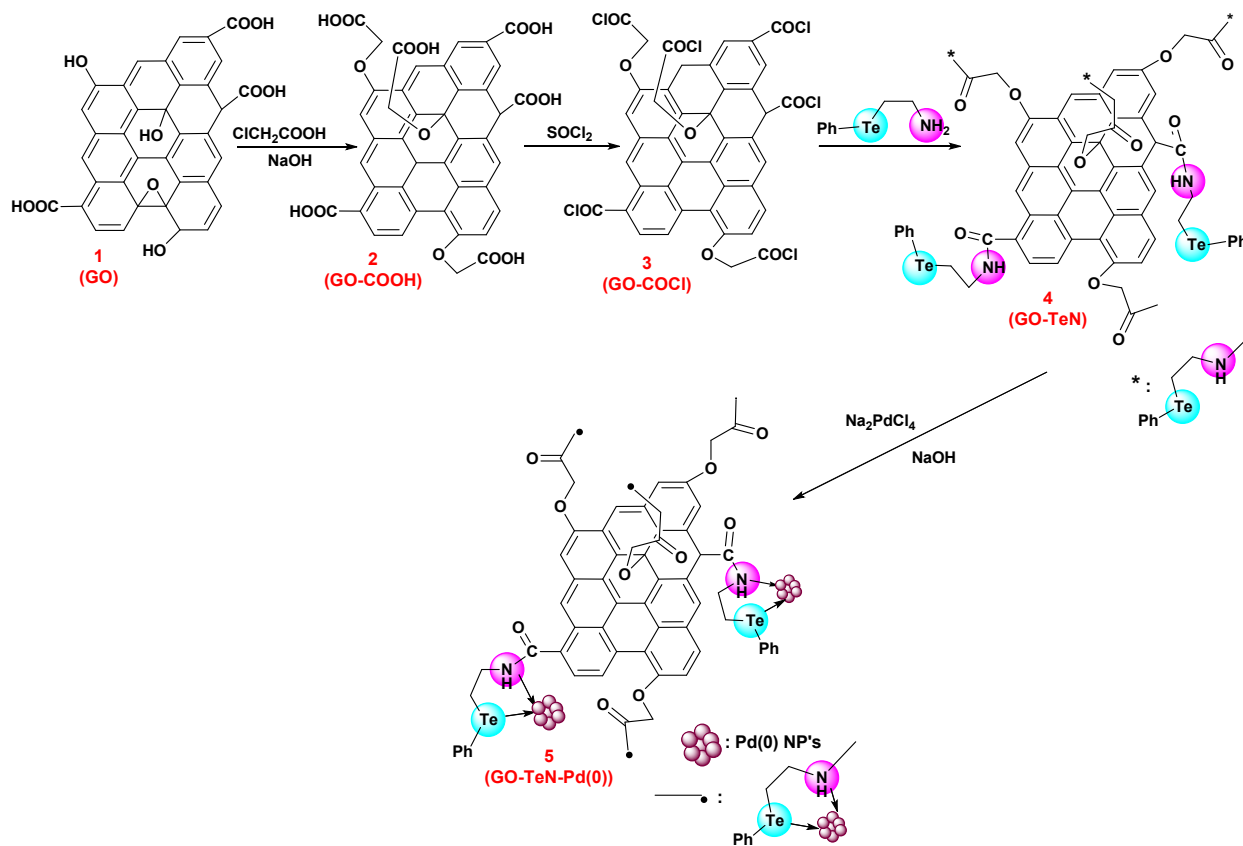

Scheme S1. Methodology for the synthesis of GO, GO-COOH, GO-COCl, GO-TeN and GO-TeN-Pd(0)

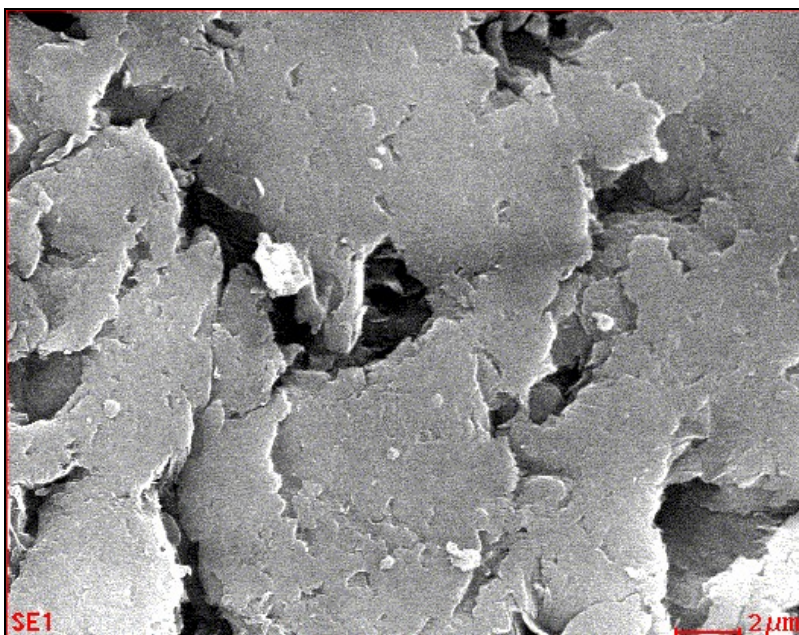

Fig. S1. Area under SEM-EDS analysis for graphene oxide (GO)

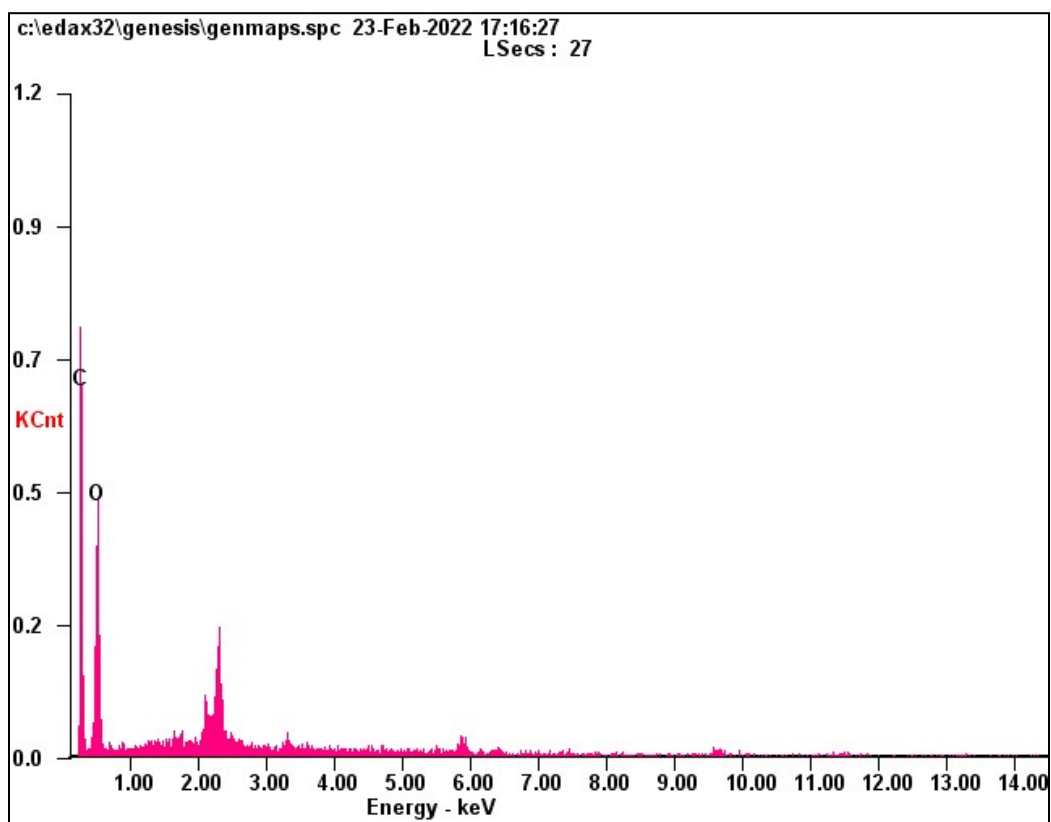

Fig. S2. EDS spectrum (composition plot) of graphene oxide (GO)

Table S1. EDS analysis of graphene oxide (GO)

| <i>Element</i> | <i>Wt%</i> | <i>At%</i> |
|----------------|------------|------------|
| <i>CK</i>      | 56.04      | 62.93      |
| <i>OK</i>      | 43.96      | 37.07      |
| <i>Matrix</i>  | Correction | ZAF        |

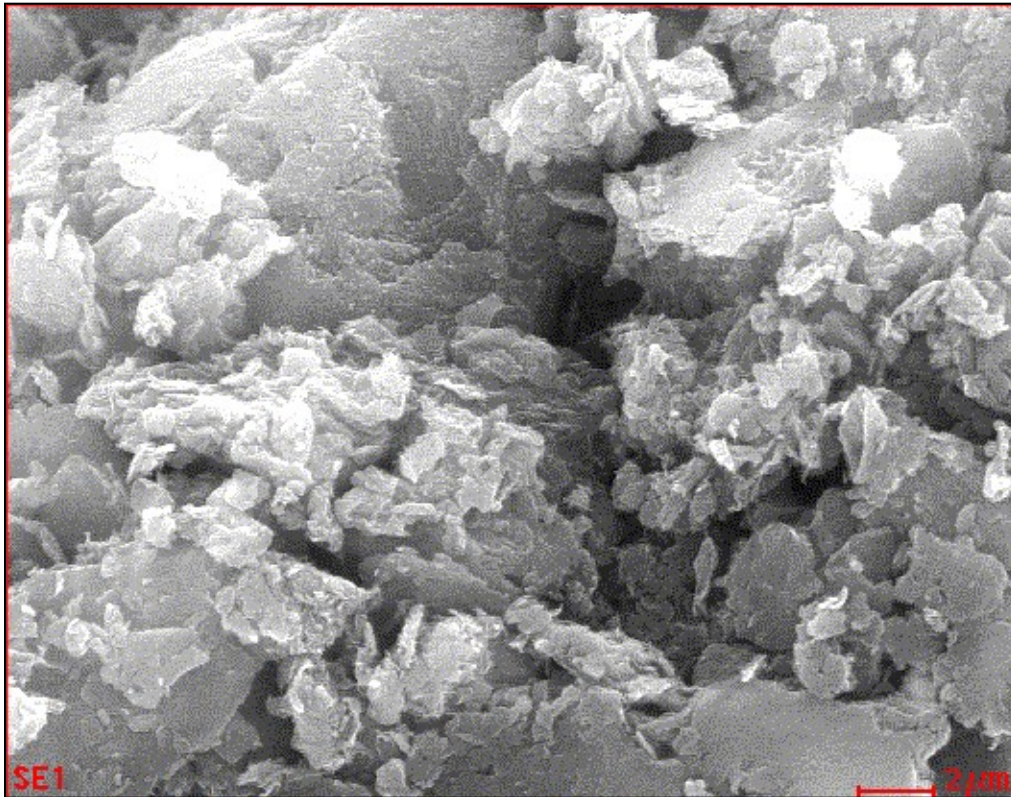

Fig S3. Area under SEM-EDS analysis for GO-TeN-Pd(0)

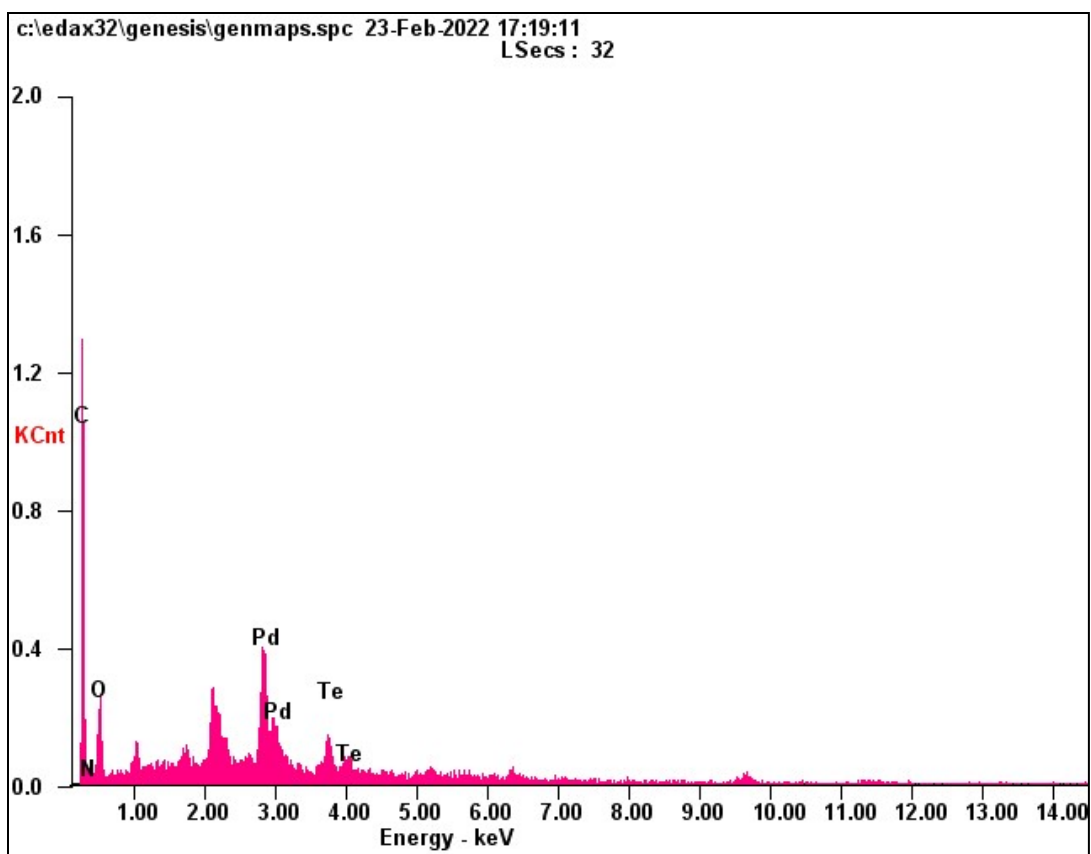

Fig S4. EDS spectrum (composition plot) of GO-TeN-Pd(0)

Table S2. EDS analysis of GO-TeN-Pd(0)

| <i>Element</i> | <i>Wt%</i> | <i>At%</i> |
|----------------|------------|------------|
| <i>CK</i>      | 57.84      | 71.64      |
| <i>NK</i>      | 05.23      | 05.55      |
| <i>OK</i>      | 22.47      | 20.90      |
| <i>PdL</i>     | 09.86      | 01.38      |
| <i>TeL</i>     | 04.61      | 00.54      |
| <i>Matrix</i>  | Correction | ZAF        |

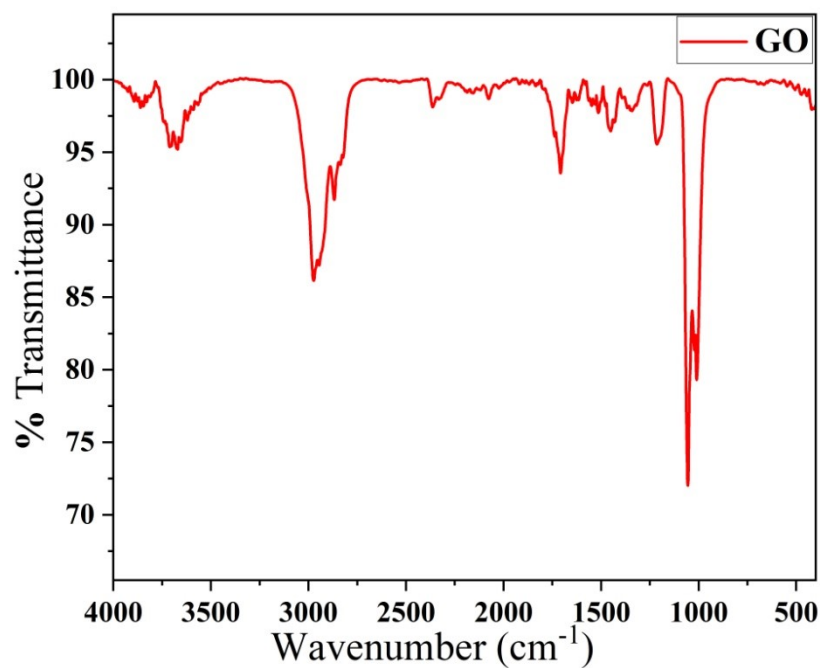

Fig S5. FT-IR spectrum of graphene oxide (GO)

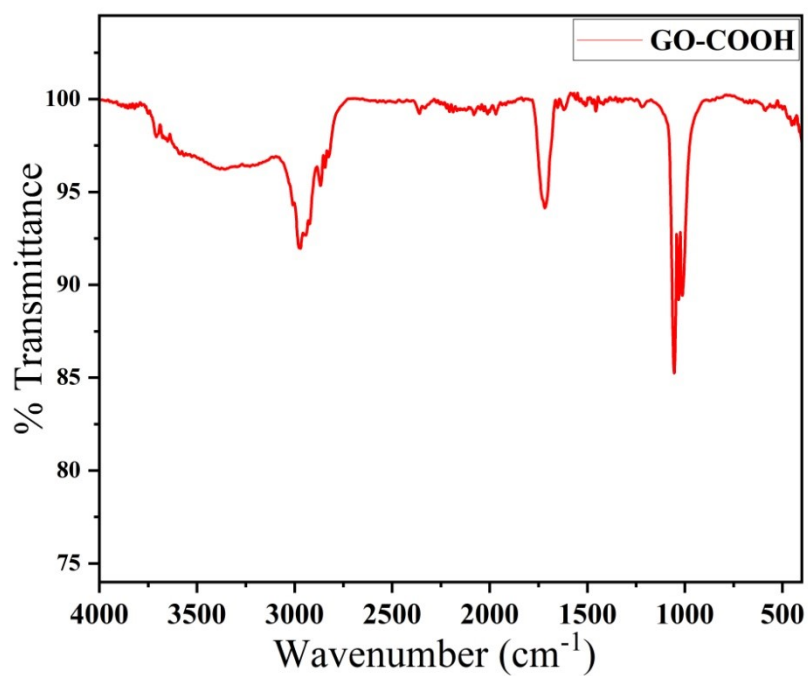

Fig S6. FT-IR spectrum of GO-COOH

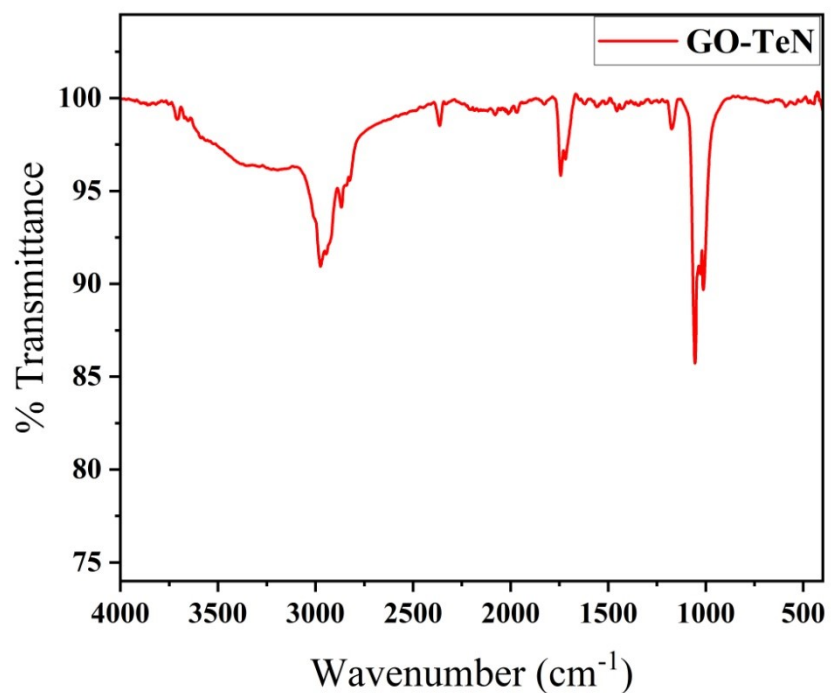

Fig S7. FT-IR spectrum of GO-TeN

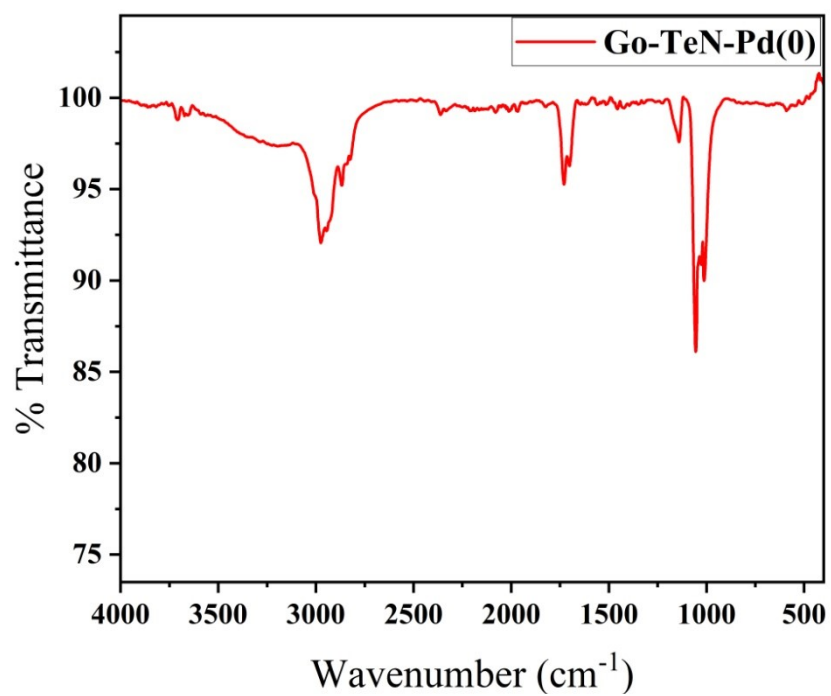

Fig S8. FT-IR spectrum of GO-TeN-Pd(0)



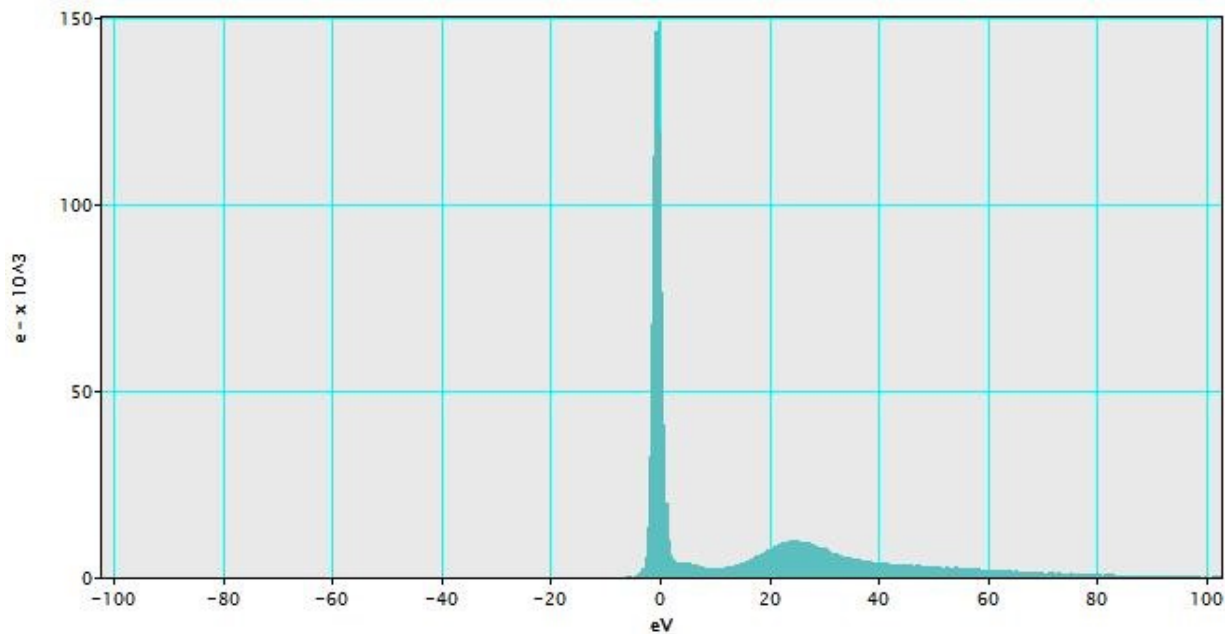

Fig S9. Low-loss EELS spectrum of graphene oxide (GO)

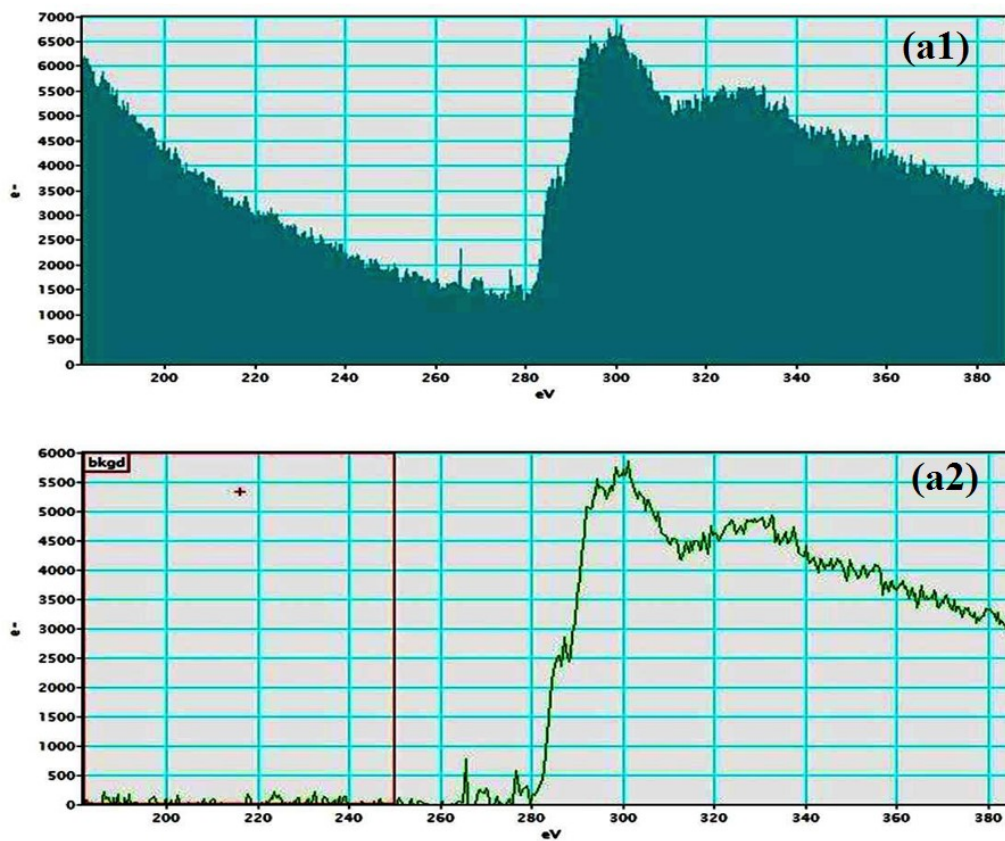

Fig S10. Carbon K-edge (a1, a2) EELS spectrum of graphene oxide (GO)

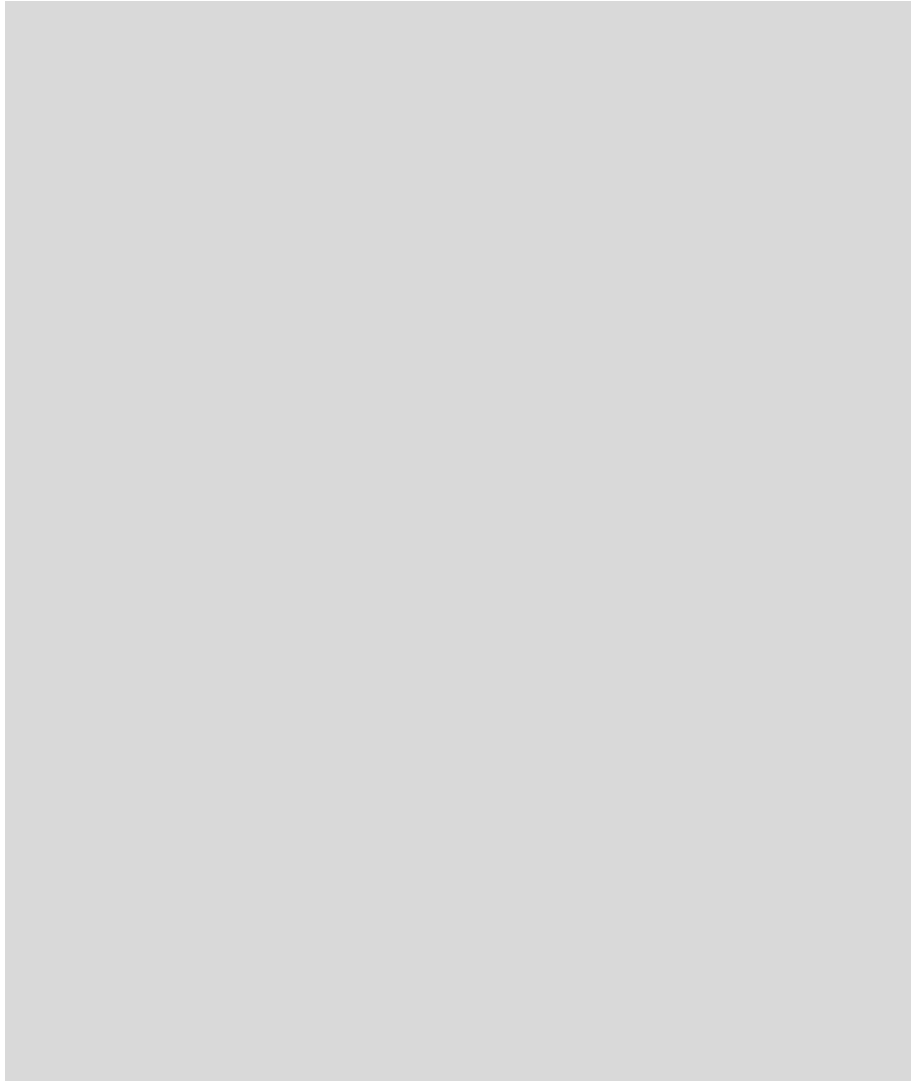

Fig S11. Oxygen K-edge (b1, b2) EELS spectrum of graphene oxide (GO)

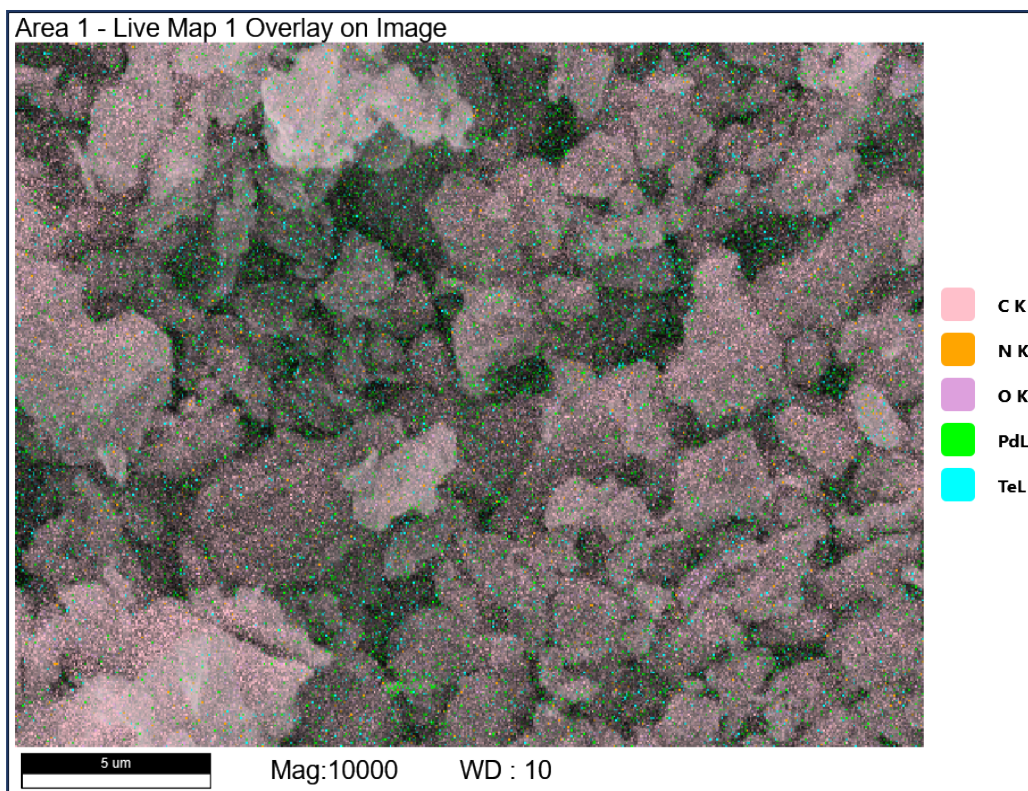

Fig S12: SEM-EDS (elemental mapping) layered view of recycled GO-TeN-Pd(0) nanocatalyst

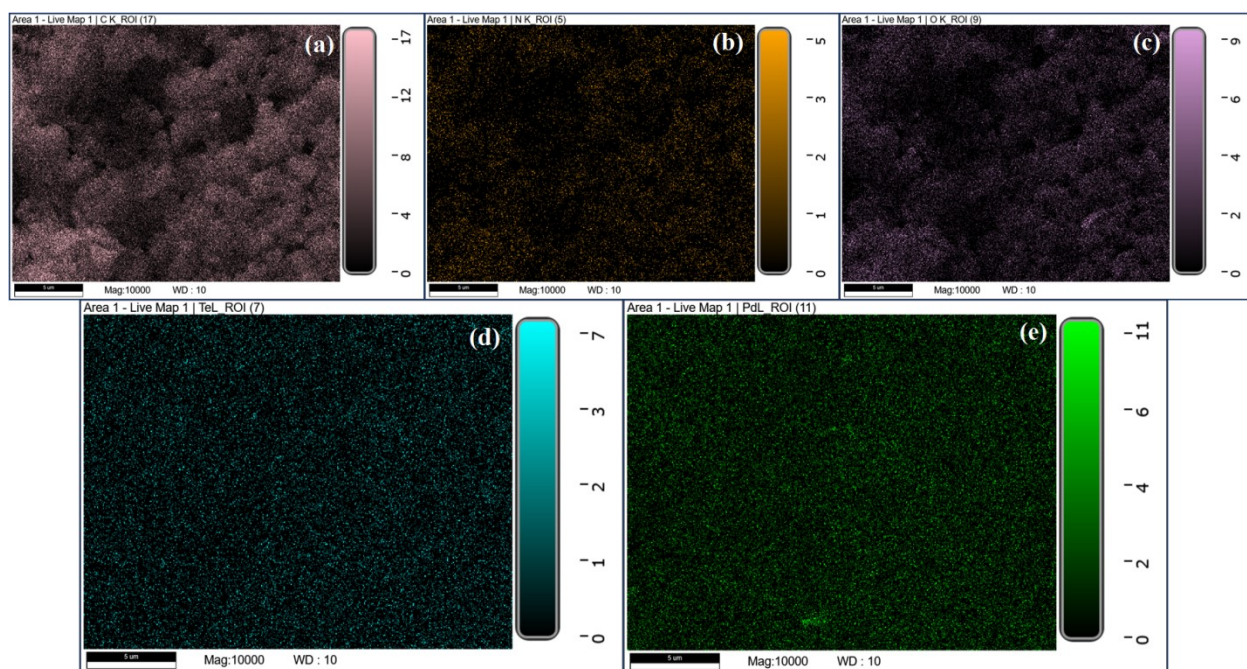

Fig S13: SEM-EDS (elemental mapping) of (a) carbon (b) nitrogen (c) oxygen (d) tellurium and (e) palladium of recycled GO-TeN-Pd(0) nanocatalyst

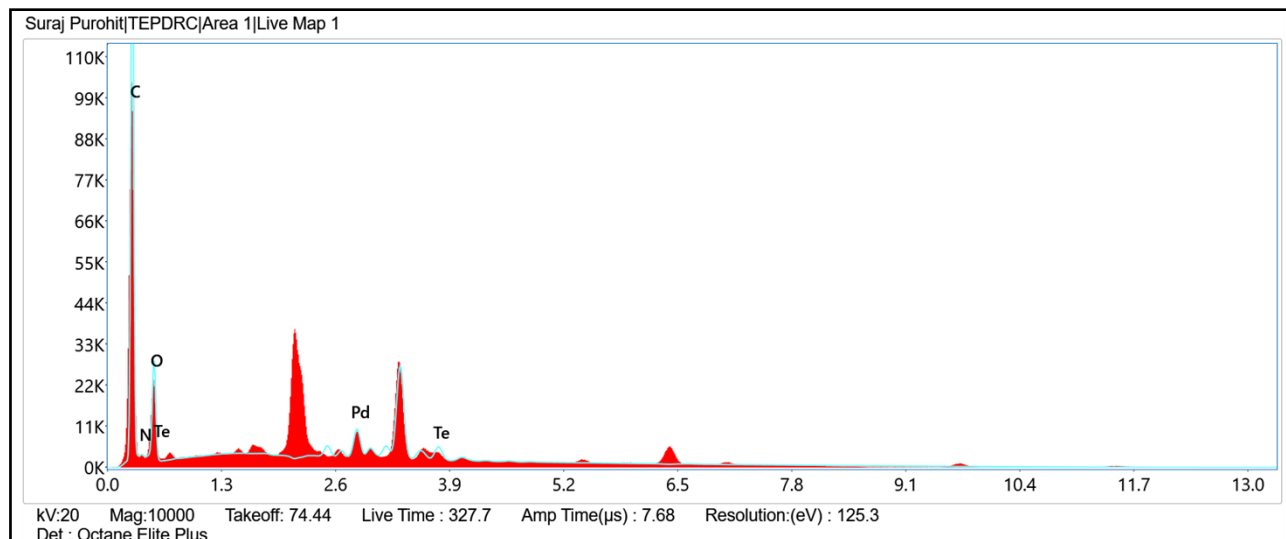

Fig. S14: SEM-EDS data (composition plot) of recycled GO-TeN-Pd(0) nanocatalyst

**Table S3.** EDS analysis of recycled GO-TeN-Pd(0)nanocatalyst

| <b>eZAF Quant Result - Analysis Uncertainty: 14.78 %</b> |                 |                 |
|----------------------------------------------------------|-----------------|-----------------|
| <i>Element</i>                                           | <i>Weight %</i> | <i>Atomic %</i> |
| <i>C K</i>                                               | <i>70.27</i>    | <i>77.71</i>    |
| <i>N K</i>                                               | <i>3.22</i>     | <i>3.05</i>     |
| <i>O K</i>                                               | <i>22.64</i>    | <i>18.79</i>    |
| <i>Pd L</i>                                              | <i>2.24</i>     | <i>0.28</i>     |
| <i>Te L</i>                                              | <i>1.64</i>     | <i>0.17</i>     |

## <sup>1</sup>H-NMR data of C-C cross-coupled products (6-15) of Suzuki-Miyaura coupling

---

### Compound 6: [1,1'-Biphenyl]-4-carbaldehyde :<sup>1</sup>

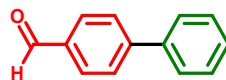

<sup>1</sup>H-NMR (500 MHz, CDCl<sub>3</sub>): δ (ppm) 10.08(s, 1H), 7.97(dt, J = 8.0, 1.5 Hz, 2H), 7.77(dd, J = 7.0, 1.5 Hz, 2H), 7.65(dt, J = 8.5, 1.5 Hz, 2H), 7.52-7.48(m, 2H), 7.44(tt, J = 7.0, 1.0 Hz, 1H). <sup>13</sup>C-NMR (125 MHz, CDCl<sub>3</sub>): δ (ppm) 192.0, 147.1, 141.1, 139.6, 135, 130.2, 128.9, 127.6, 127.3

---

### Compound 7: 1-([1,1'-Biphenyl]-4-yl)ethanone :<sup>1</sup>

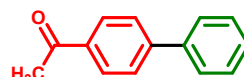

<sup>1</sup>H-NMR (500 MHz, CDCl<sub>3</sub>): δ (ppm) 8.05(dt, J = 10.0, 2.0 Hz, 2H), 7.70(dt, J = 9.0, 1.8 Hz, 2H), 7.64(dd, J = 9.0, 2.0 Hz, 2H), 7.49(t, J = 7.2 Hz, 2H), 7.42(tt, J = 7.5, 1.5 Hz, 1H), 2.66(s, 3H). <sup>13</sup>C-NMR (125 MHz, CDCl<sub>3</sub>): δ (ppm) 173.6, 131.9, 127.2, 123.9, 118.53, 118.50, 117.95, 117.17, 117.13, 36.71

---

### Compound 8: [1,1'-Biphenyl]-4-carbonitrile :<sup>1</sup>

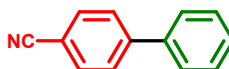

<sup>1</sup>H-NMR (500 MHz, CDCl<sub>3</sub>): δ (ppm) 7.72 (d, 2H, J = 8.0 Hz), 7.68 (d, 2H, J = 8.0 Hz), 7.59 (d, 2H, J = 6.8 Hz), 7.51-7.41 (m, 3H). <sup>13</sup>C-NMR (125 MHz, CDCl<sub>3</sub>): δ (ppm) 131.85, 126.64, 121.41, 118.63, 118.27, 117.51, 117.12, 110.52, 104.02

---

### Compound 9: 4-Methyl-1,1'-biphenyl :<sup>1</sup>

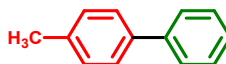

<sup>1</sup>H-NMR (500 MHz, CDCl<sub>3</sub>): δ (ppm) 7.62(t, J = 4.2 Hz, 2H), 7.53(d, J = 8.0 Hz, 2H), 7.46(t, J = 7.5 Hz, 2H), 7.36(t, J = 11.5 Hz, 1H), 7.28(t, J = 5.8 Hz, 2H), 2.43(s, 3H). <sup>13</sup>C-NMR (125 MHz, CDCl<sub>3</sub>): δ (ppm) 128.36, 125.99, 124.74, 118.93, 118.38, 117.11, 116.82, 107.59, 32.25

---

### Compound 10: [1,1'-Biphenyl]-4-carboxylic acid :<sup>2</sup>

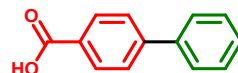

<sup>1</sup>H NMR (500 MHz, DMSO-d<sub>6</sub>): δ (ppm) 13.17(s, 1H), 8.03(d, J = 8.5 Hz, 2H), 7.79(d, J = 8.0 Hz, 2H), 7.74(t, J = 4.2 Hz, 2H), 7.51(t, J = 7.5 Hz, 2H), 7.42(t, J = 7.2 Hz, 1H). <sup>13</sup>C-NMR (125 MHz, CDCl<sub>3</sub>): δ (ppm) 172.03, 146.50, 141.36, 133.75, 130.17, 129.55, 129.32, 128.46, 124.91

---

### Compound 11: 4-Nitro-1,1'-biphenyl :<sup>1</sup>

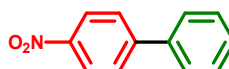

$^1\text{H-NMR}$  (500 MHz,  $\text{CDCl}_3$ ):  $\delta$  (ppm) 8.30 (d,  $J = 9.0$  Hz, 2H), 7.74 (d,  $J = 9.0$  Hz, 2H), 7.63 (d,  $J = 9.0$  Hz, 2H), 7.45-7.53 (m, 3H).  $^{13}\text{C-NMR}$  (125 MHz,  $\text{CDCl}_3$ ):  $\delta$  (ppm) 147.56, 146.99, 138.68, 129.11, 128.88, 127.74, 127.33, 124.05

---

**Compound 12: Biphenyl :**<sup>1</sup>

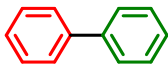

$^1\text{H-NMR}$  (500 MHz,  $\text{CDCl}_3$ ):  $\delta$  (ppm) 7.59 (dd,  $J = 8.5, 2.0$  Hz, 4H), 7.44 (t,  $J = 8.0$  Hz, 4H), 7.34 (t,  $J = 7.5$  Hz, 2H).  $^{13}\text{C-NMR}$  (125 MHz,  $\text{CDCl}_3$ ):  $\delta$  (ppm) 141.21, 128.74, 127.15, 115.24

---

**Compound 13: 4-Methoxy-1,1'-biphenyl :**<sup>1</sup>

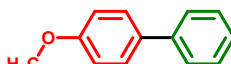

$^1\text{H-NMR}$  (500 MHz,  $\text{CDCl}_3$ ):  $\delta$  (ppm) 7.59-7.53 (m, 4H), 7.43 (t,  $J = 7.8$  Hz, 2H), 7.32 (tt,  $J = 7.5, 3.0$  Hz, 1H), 7.00 (dt,  $J = 9.5, 3.0$  Hz, 2H), 3.87 (s, 3H).  $^{13}\text{C-NMR}$  (125 MHz,  $\text{CDCl}_3$ ):  $\delta$  (ppm) 137.42, 135.45, 132.28, 130.92, 129.80, 129.47, 127.63, 21.99

---

**Compound 14: [1,1'-Biphenyl]-4-amine :**<sup>2</sup>

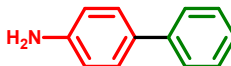

$^1\text{H-NMR}$  (500 MHz,  $\text{CDCl}_3$ ):  $\delta$  (ppm) 7.52-7.56 (m, 2H), 7.37-7.43 (m, 4H), 7.21-7.25 (m, 1H), 6.75 (d,  $J = 8.4$  Hz, 2H), 3.71 (s, 2H).  $^{13}\text{C-NMR}$  (125 MHz,  $\text{CDCl}_3$ ):  $\delta$  (ppm) 145.33, 141.17, 131.97, 129.62, 128.72, 127.13, 116.69, 110.19

---

**Compound 15: [1,1'-Biphenyl]-4-yl(phenyl)methanone :**

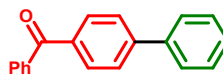

$^1\text{H-NMR}$  (500 MHz,  $\text{CDCl}_3$ ):  $\delta$  (ppm) 7.42-7.49 (m, 6H), 7.33 (d,  $J = 7.2$  Hz, 2H), 2.28 (s, 6H).  $^{13}\text{C-NMR}$  (125 MHz,  $\text{CDCl}_3$ ):  $\delta$  (ppm) 172.46, 131.53, 127.31, 125.53, 124.31, 121.27, 119.95, 119.36, 118.54, 118.01, 117.19, 116.93

---

## NMR Spectra of Suzuki-Miyaura cross coupled products.

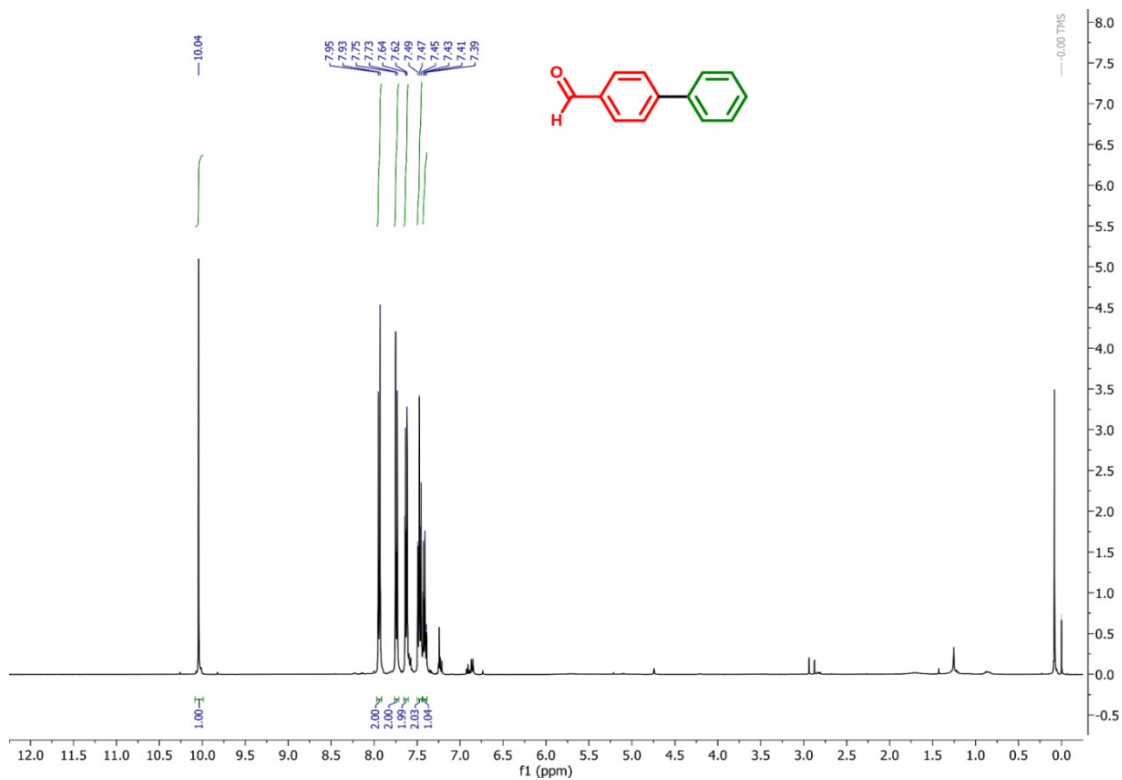

Fig S15. Full view of <sup>1</sup>H NMR spectrum of [1,1'-biphenyl]-4-carbaldehyde

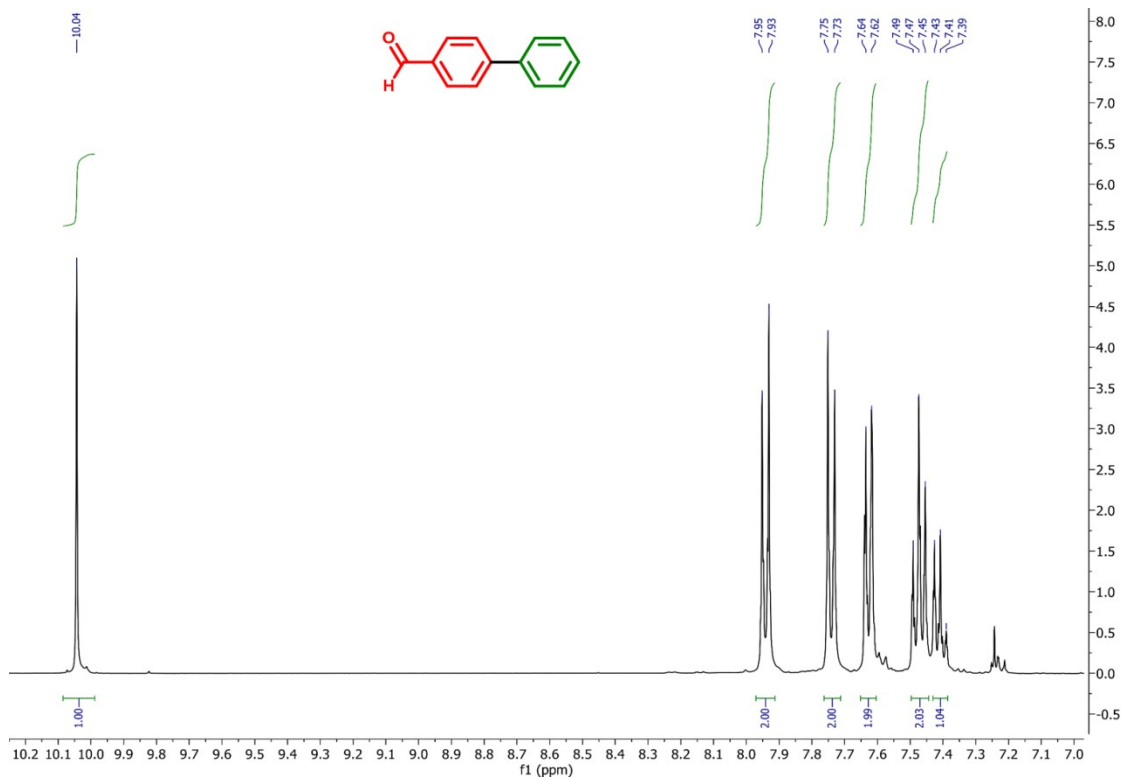

Fig S16. Zoomed view of <sup>1</sup>H NMR spectrum of [1,1'-biphenyl]-4-carbaldehyde

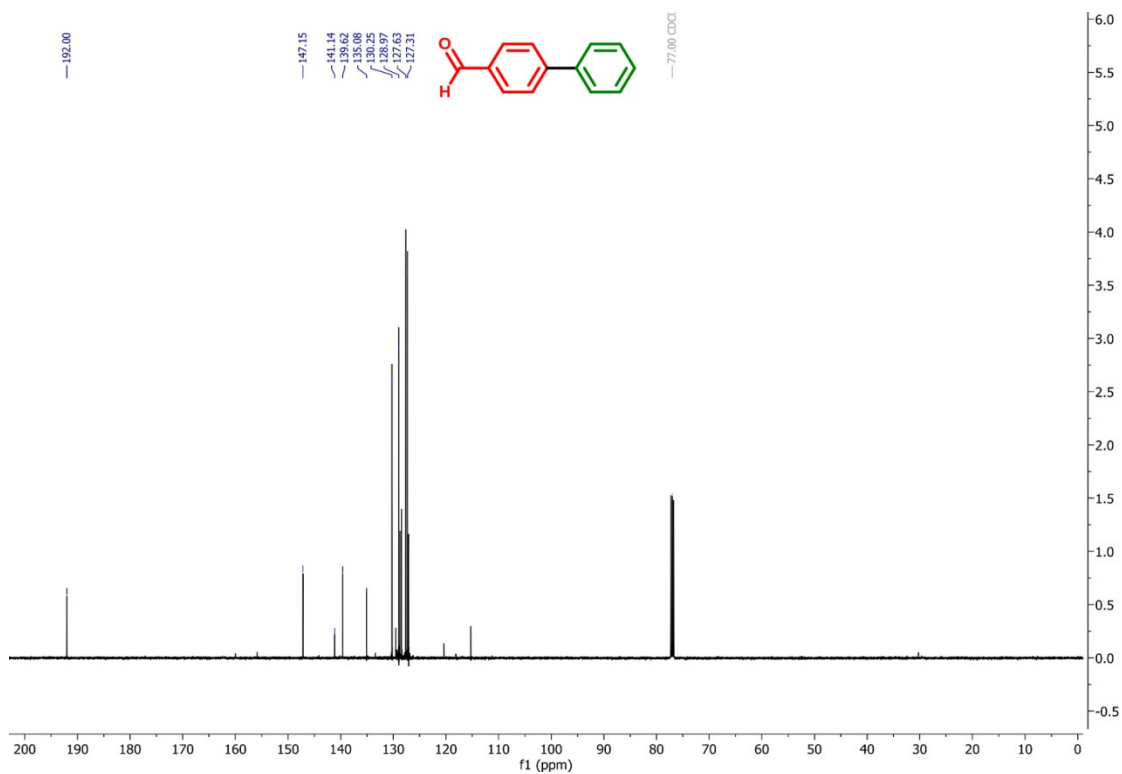

Fig S17.  $^{13}\text{C}$  NMR spectrum of [1,1'-biphenyl]-4-carbaldehyde

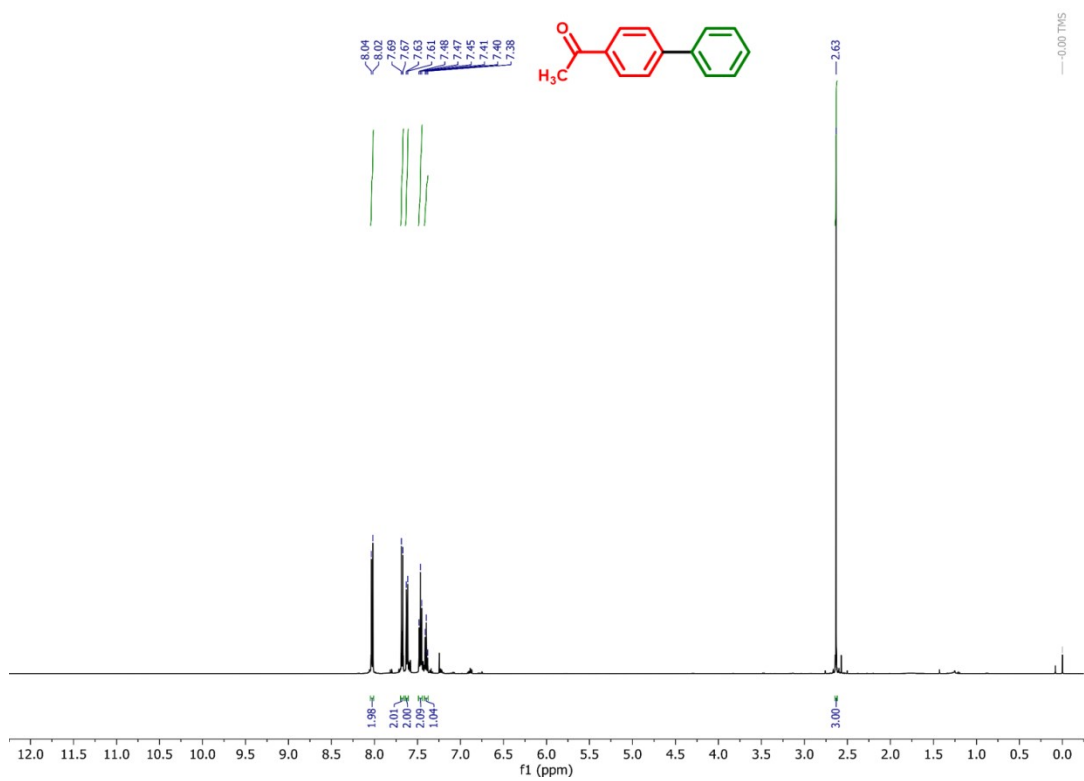

Fig S18. Full view of  $^1\text{H}$  NMR spectrum of 1-([1,1'-biphenyl]-4-yl)ethanone



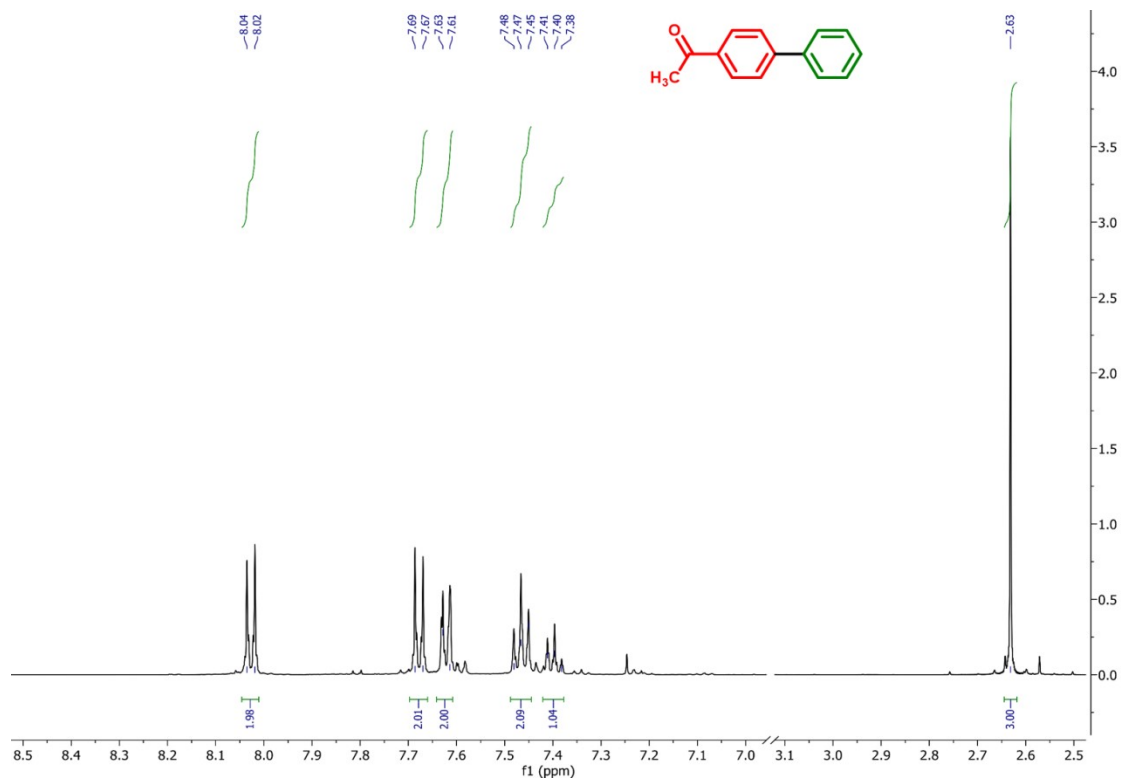

Fig S19. Zoomed view of  $^1\text{H}$  NMR spectrum of 1-([1,1'-biphenyl]-4-yl)ethanone

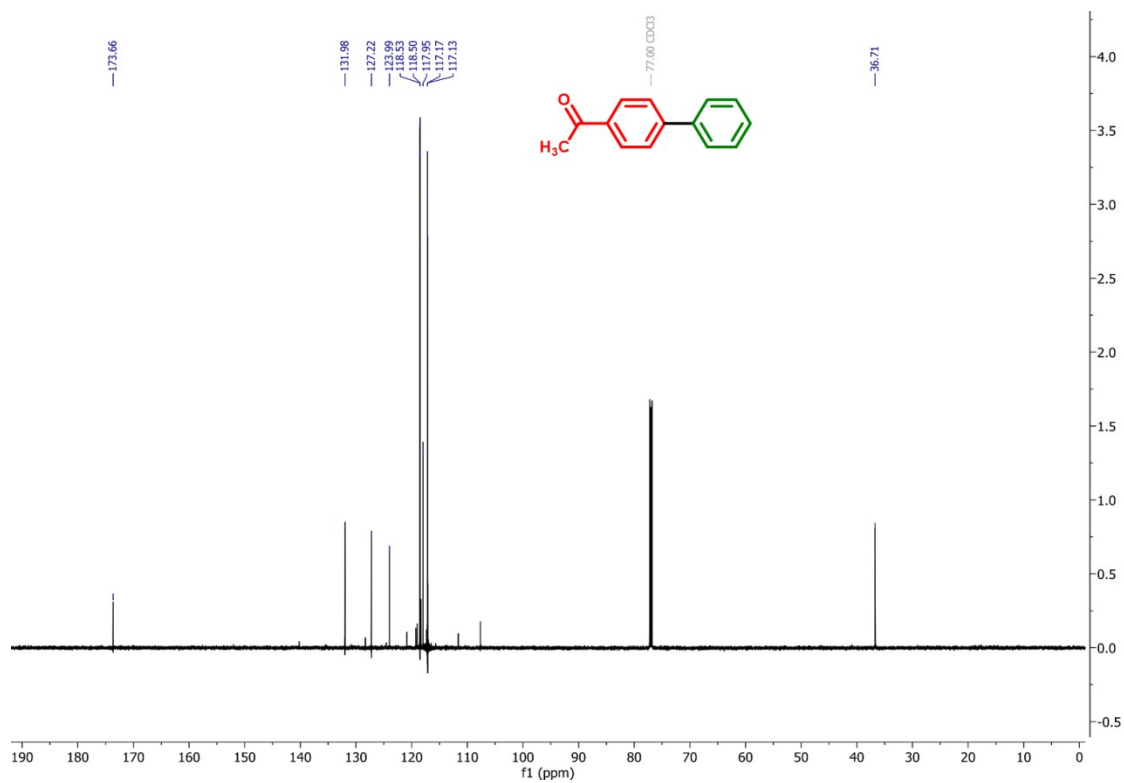

Fig S20.  $^{13}\text{C}$  NMR spectrum of 1-([1,1'-biphenyl]-4-yl)ethanone

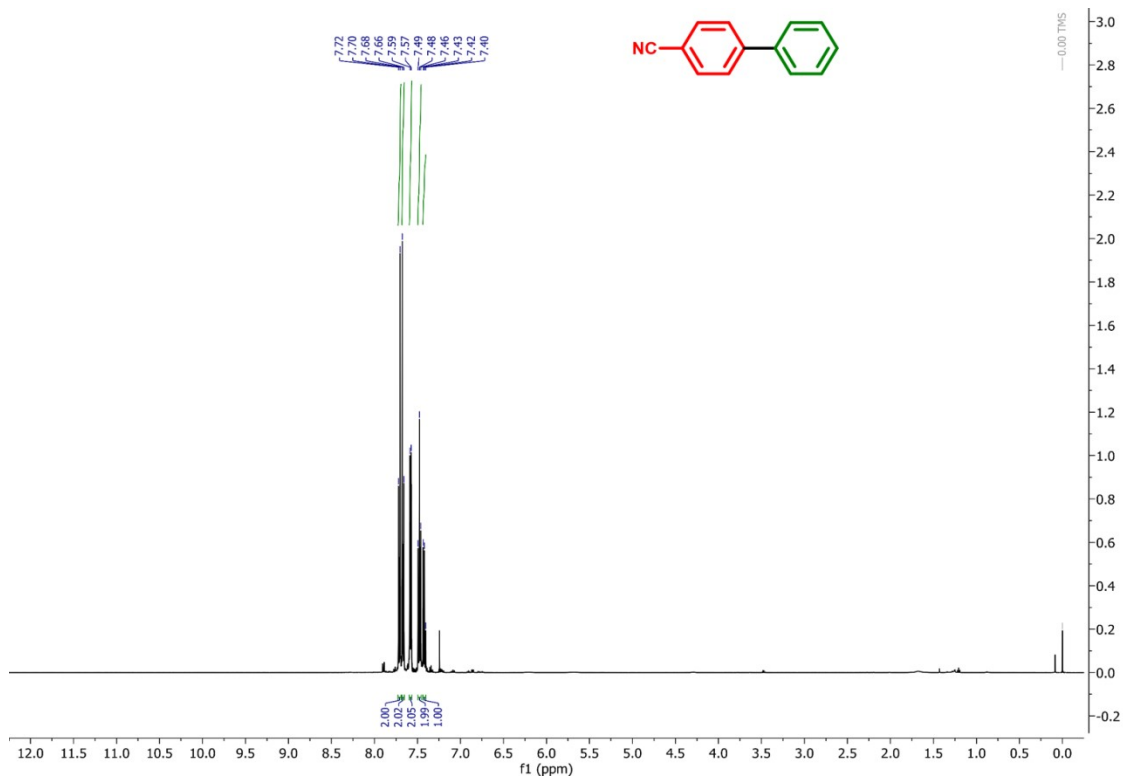

Fig S21. Full view of  $^1\text{H}$  NMR spectrum of [1,1'-biphenyl]-4-carbonitrile

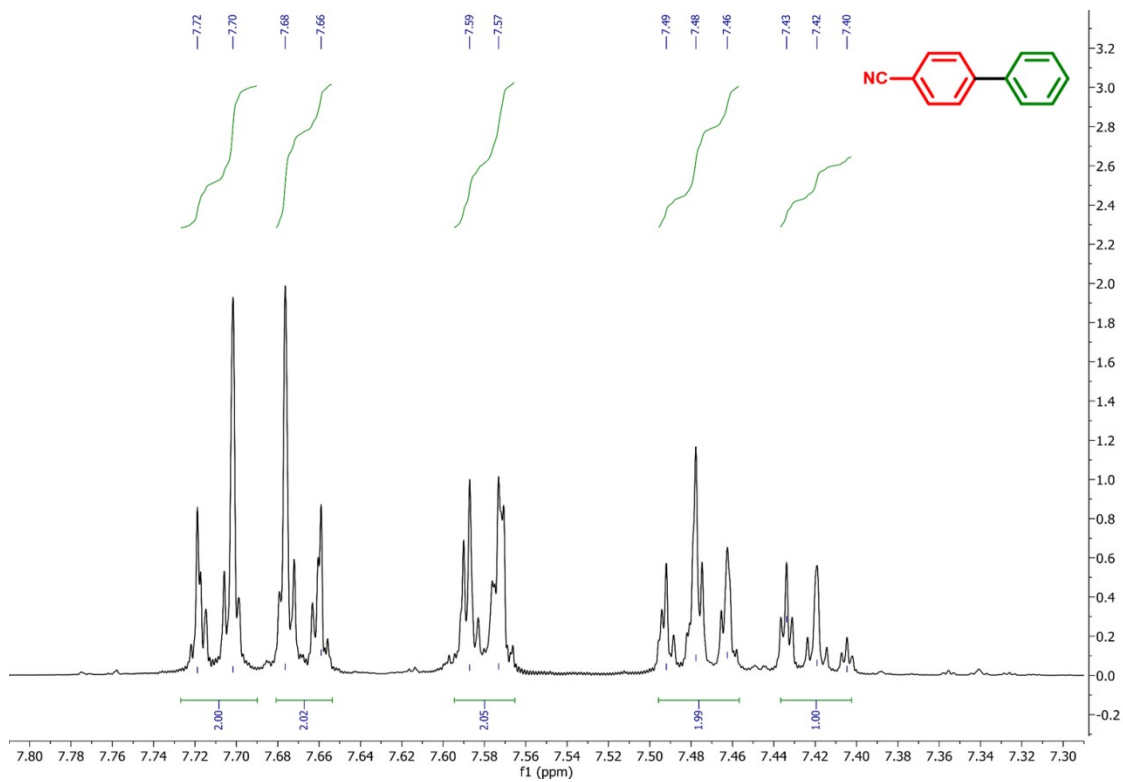

Fig S22. Zoomed view of  $^1\text{H}$  NMR spectrum of [1,1'-biphenyl]-4-carbonitrile

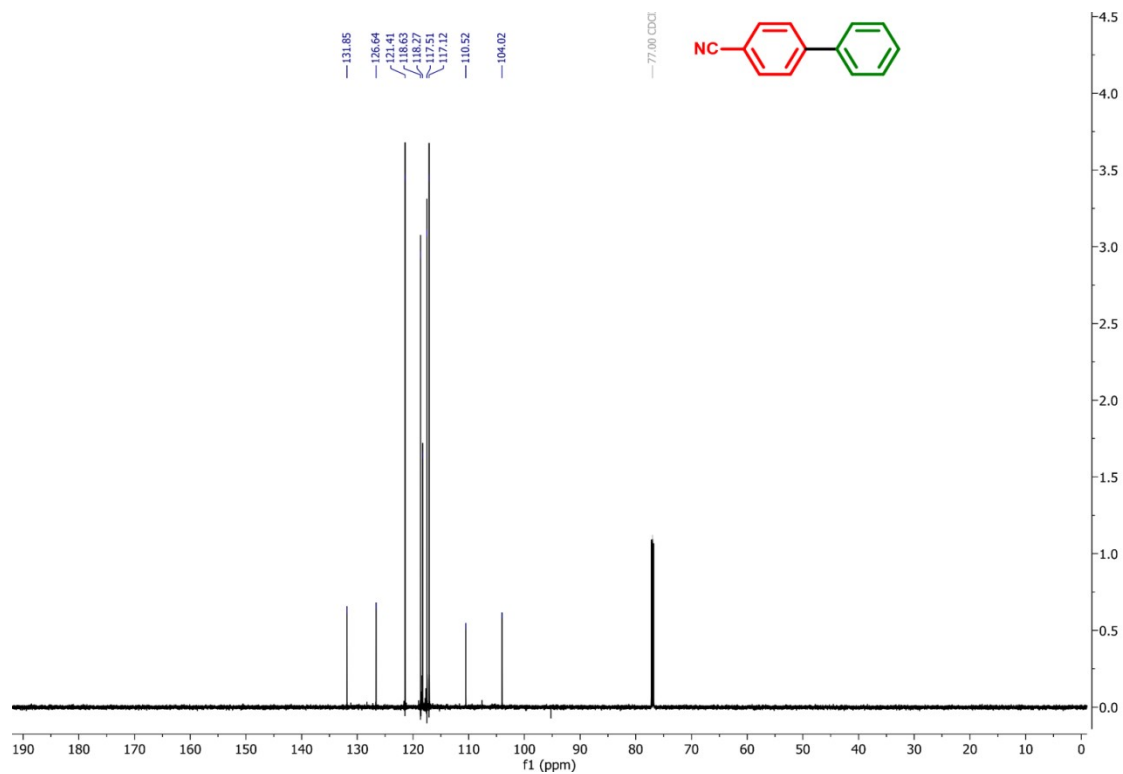

Fig S23. <sup>13</sup>C NMR spectrum of [1,1'-biphenyl]-4-carbonitrile

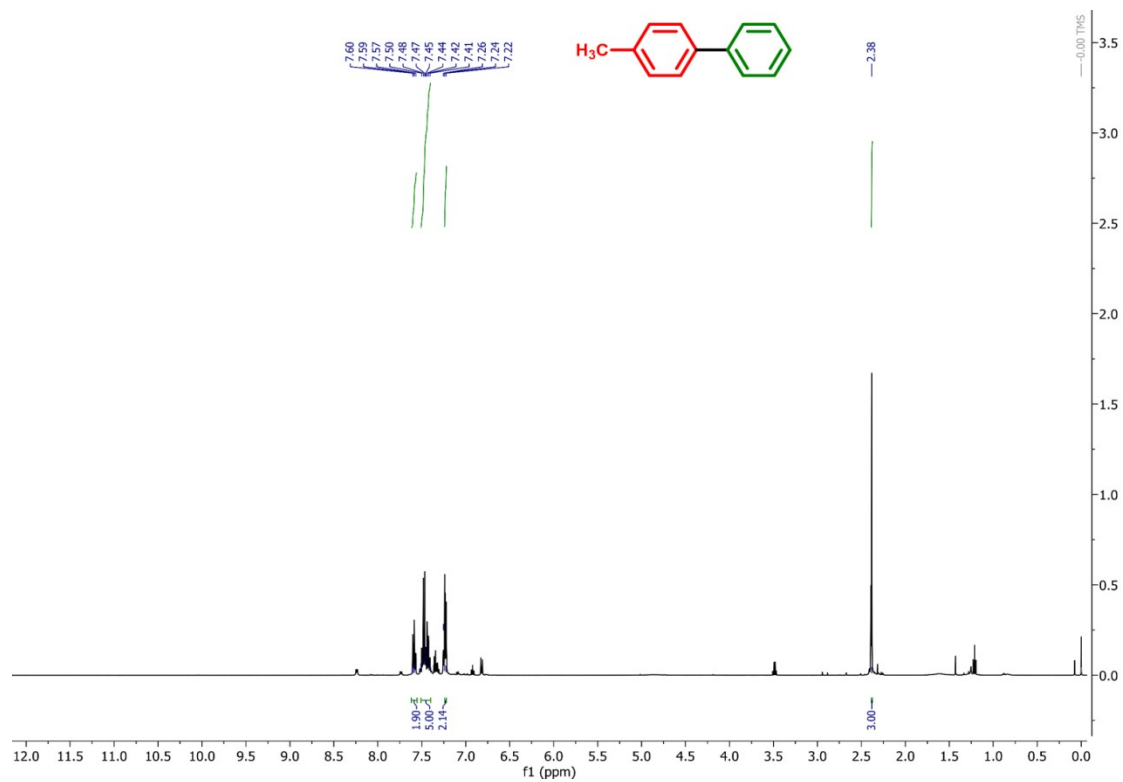

Fig S24. Full view of <sup>1</sup>H NMR spectrum of 4-methyl-1,1'-biphenyl

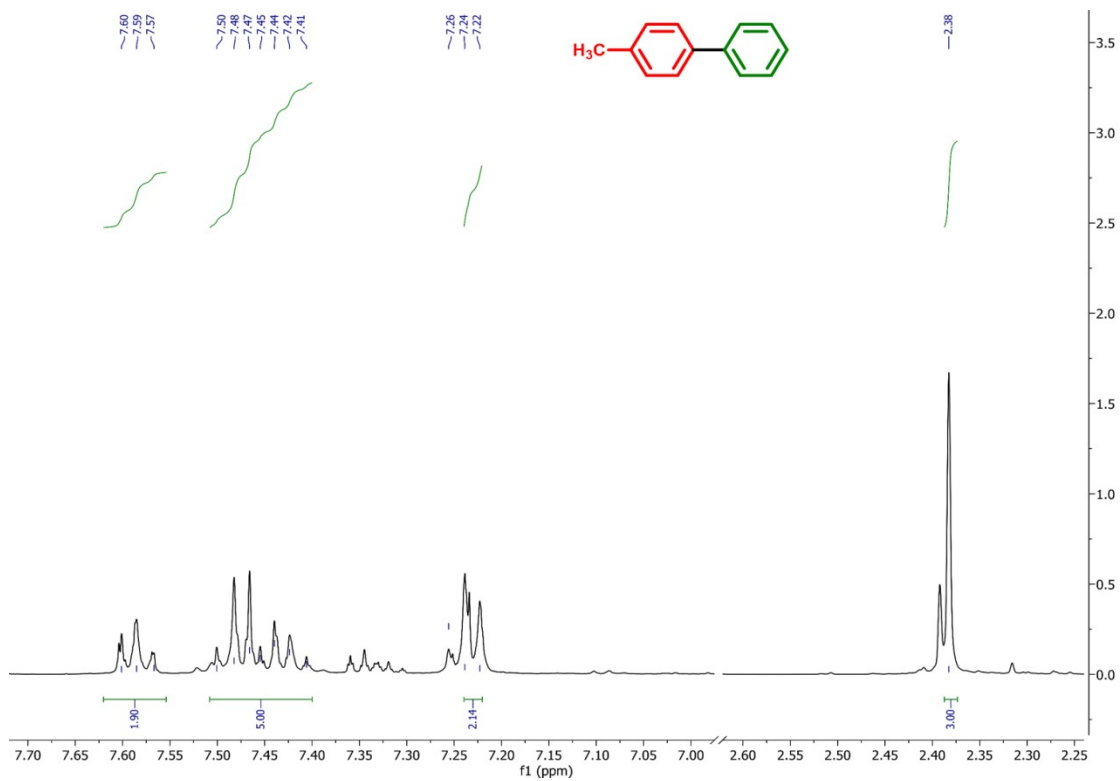

Fig S25. Zoomed view of  $^1\text{H}$  NMR spectrum of 4-methyl-1,1'-biphenyl

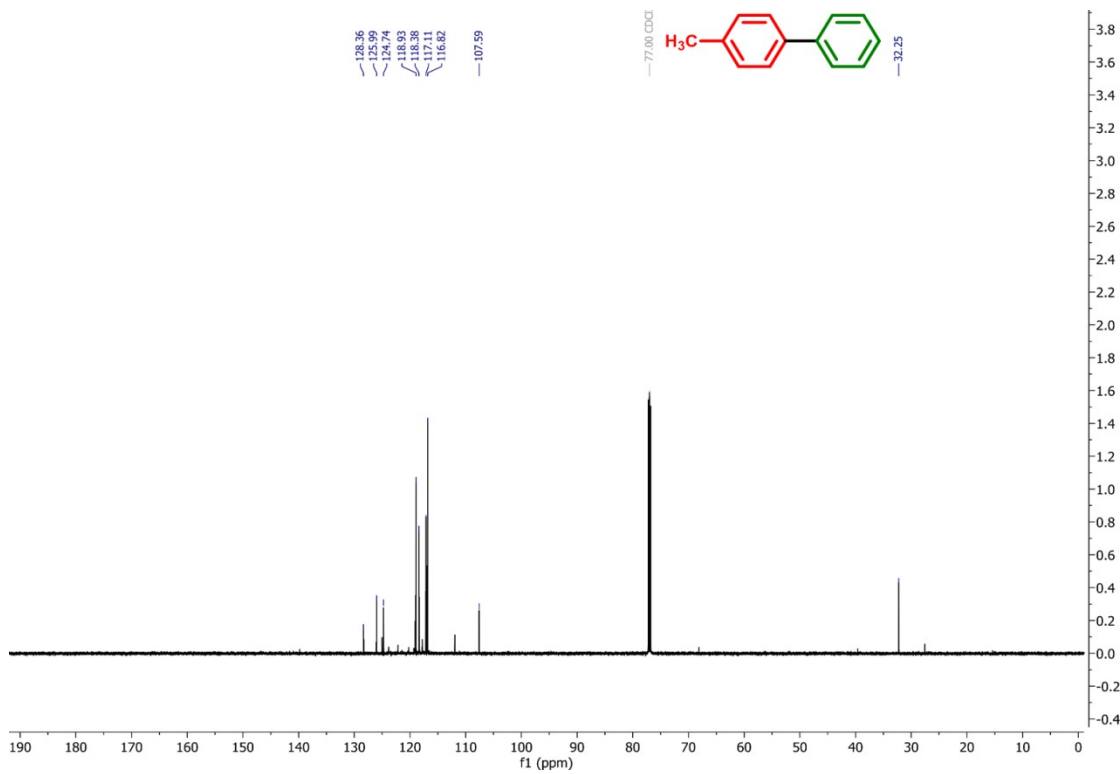

Fig S26.  $^{13}\text{C}$  NMR spectrum of 4-methyl-1,1'-biphenyl

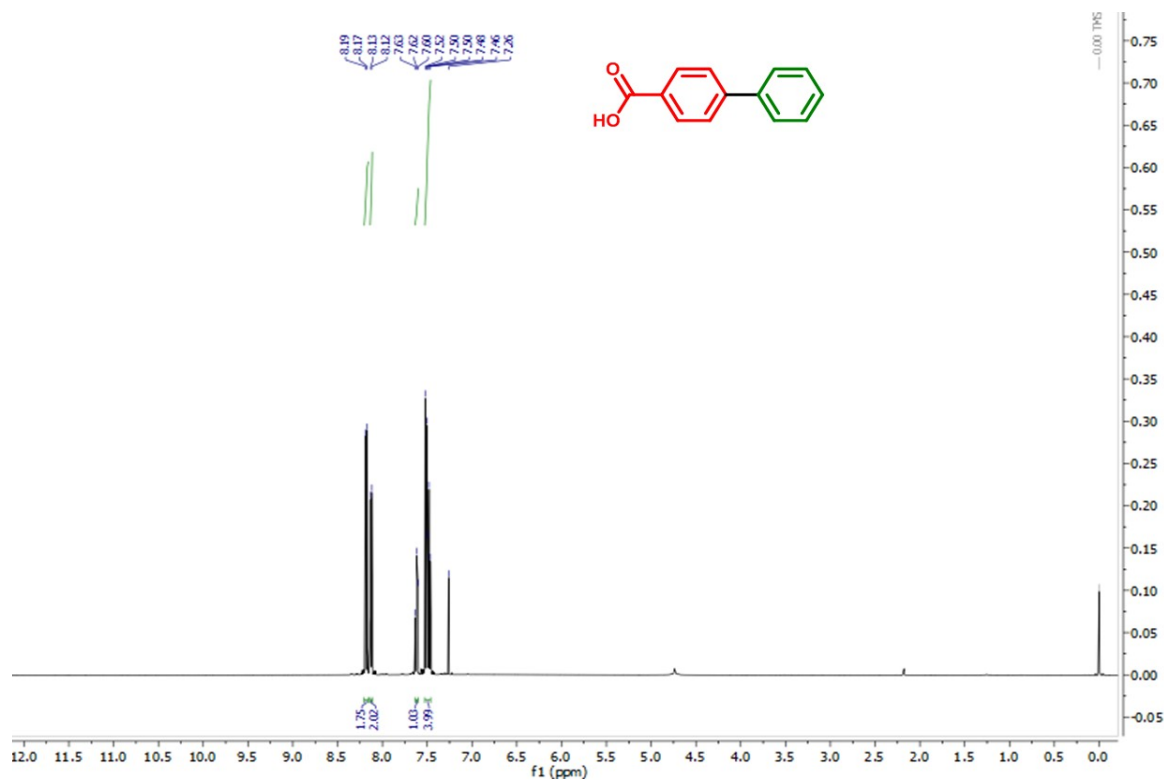

Fig S27. Full view of  $^1\text{H}$  NMR spectrum of [1,1'-biphenyl]-4-carboxylic acid

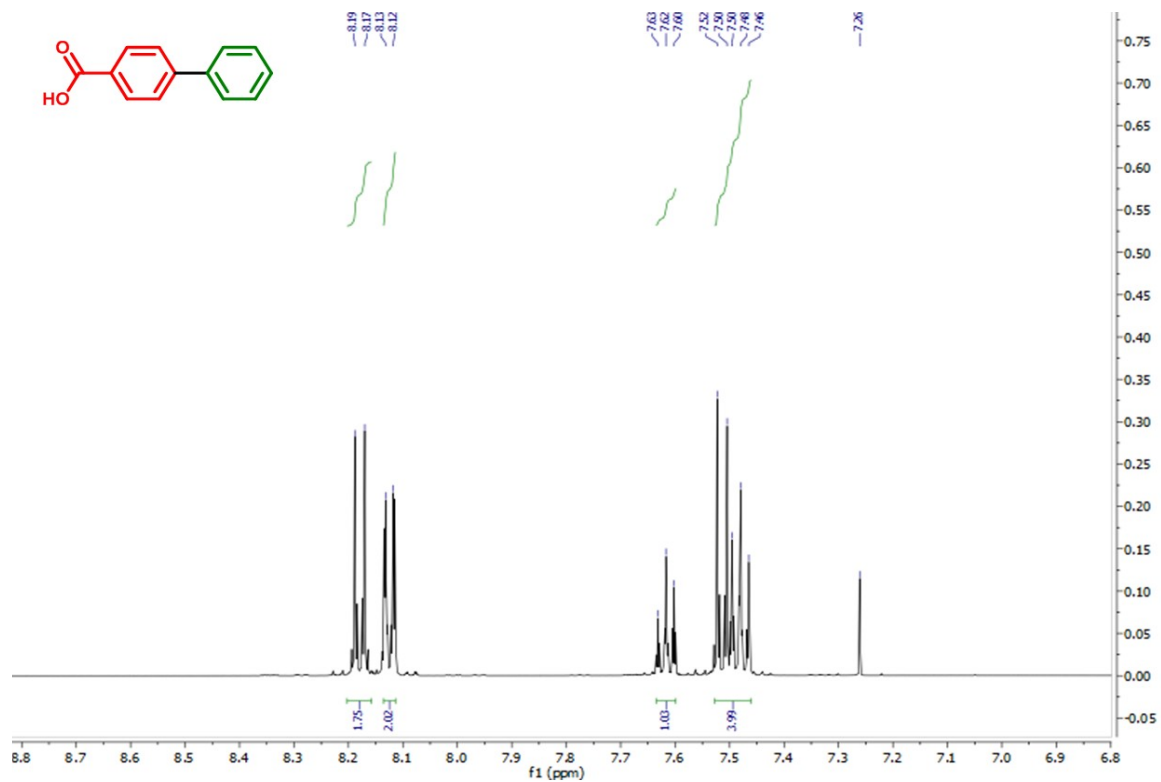

Fig S28. Zoomed view of  $^1\text{H}$  NMR spectrum of [1,1'-biphenyl]-4-carboxylic acid

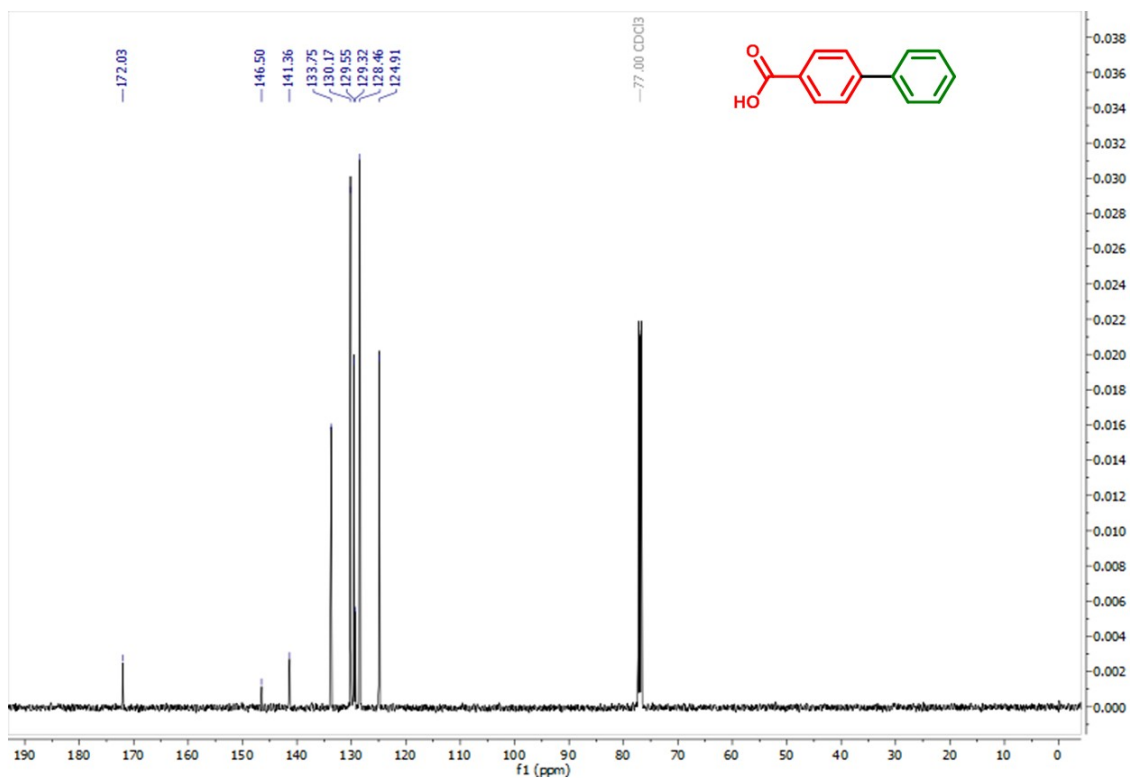

Fig S29. <sup>13</sup>C NMR spectrum of [1,1'-biphenyl]-4-carboxylic acid

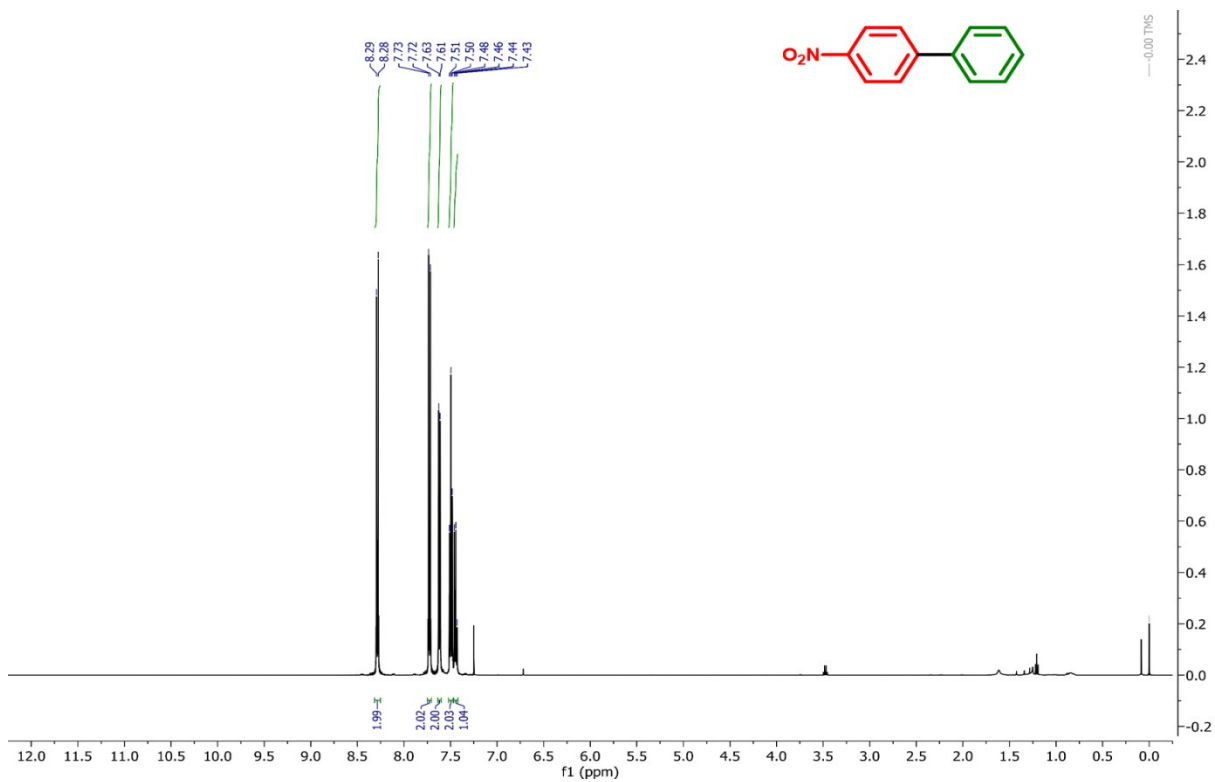

Fig S30. Full view of <sup>1</sup>H NMR spectrum of 4-nitro-1,1'-biphenyl

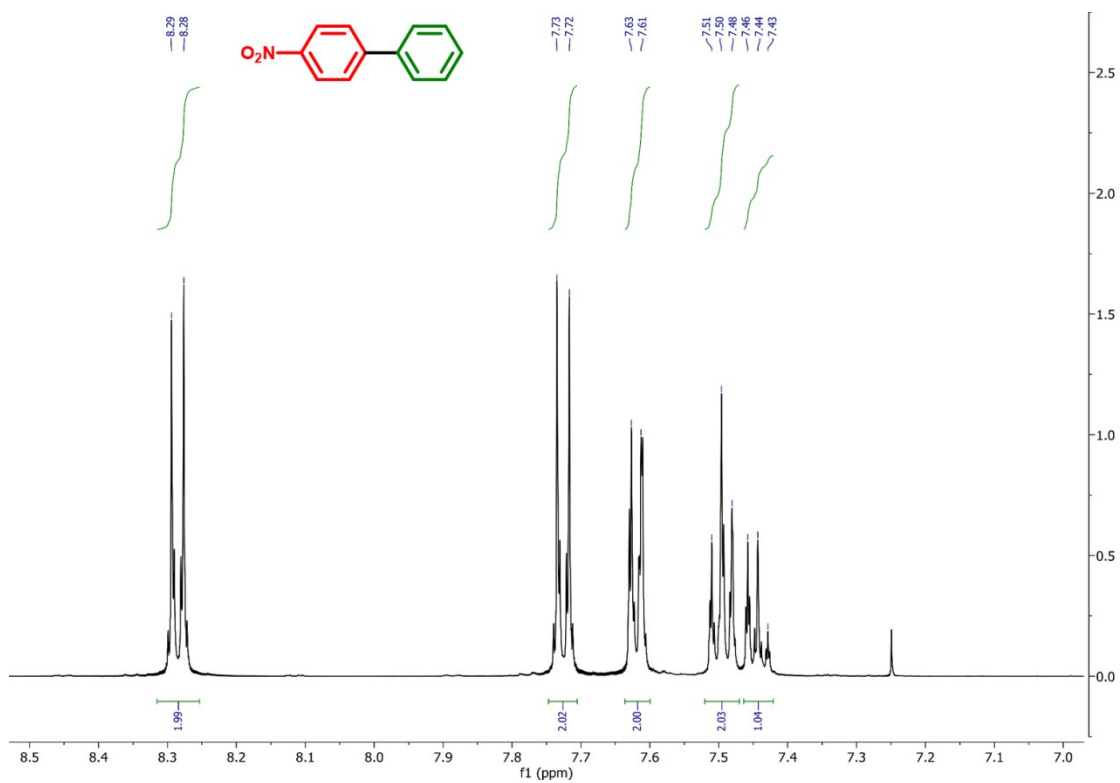

Fig S31. Zoomed view of  $^1\text{H}$  NMR spectrum of 4-nitro-1,1'-biphenyl

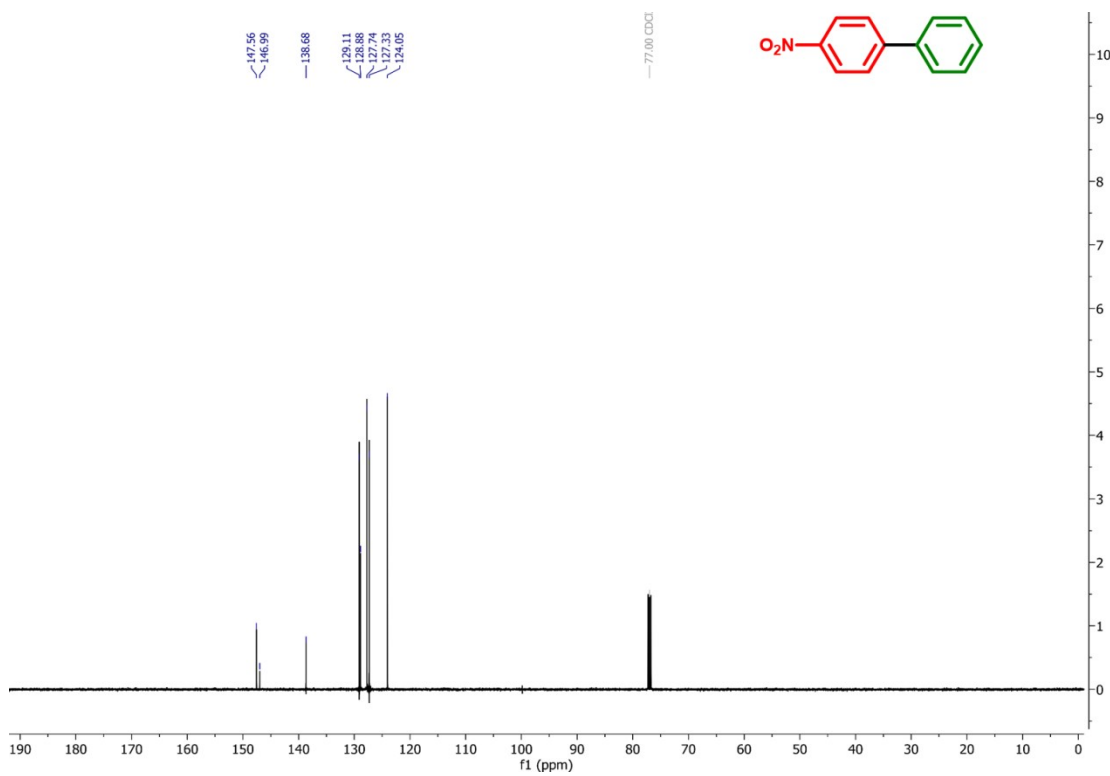

Fig S32.  $^{13}\text{C}$  NMR spectrum of 4-nitro-1,1'-biphenyl

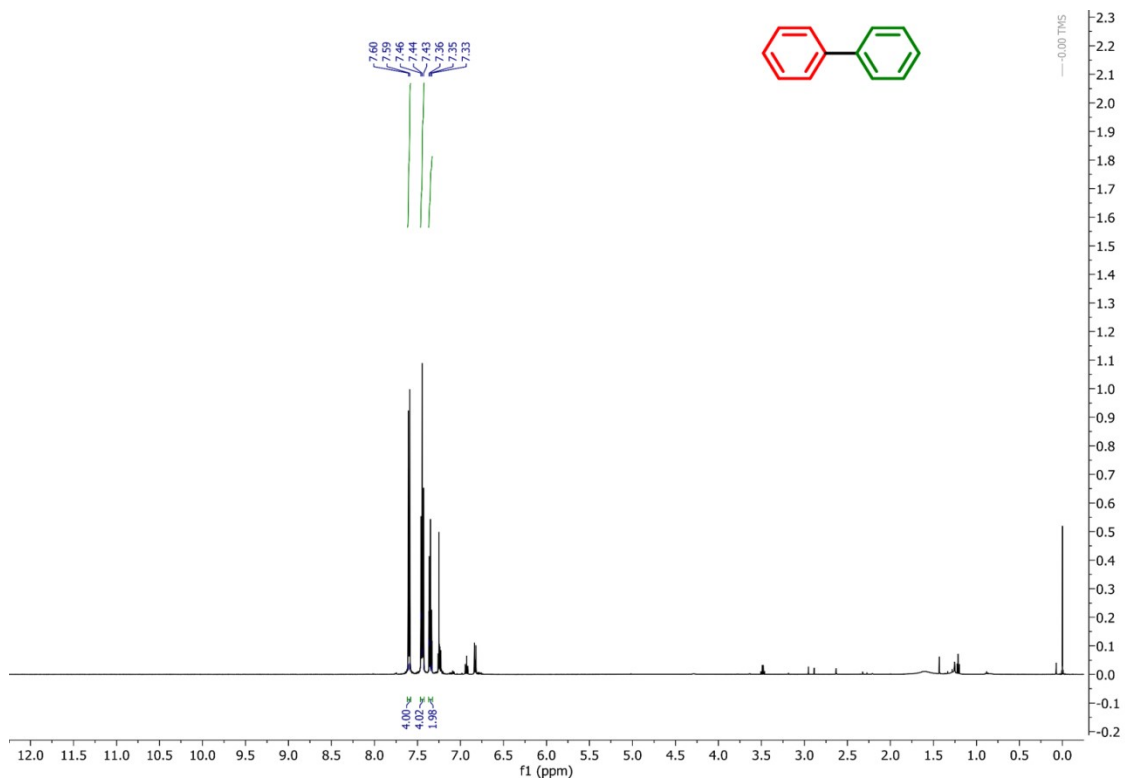

Fig S33. Full view of  $^1\text{H}$  NMR spectrum of biphenyl

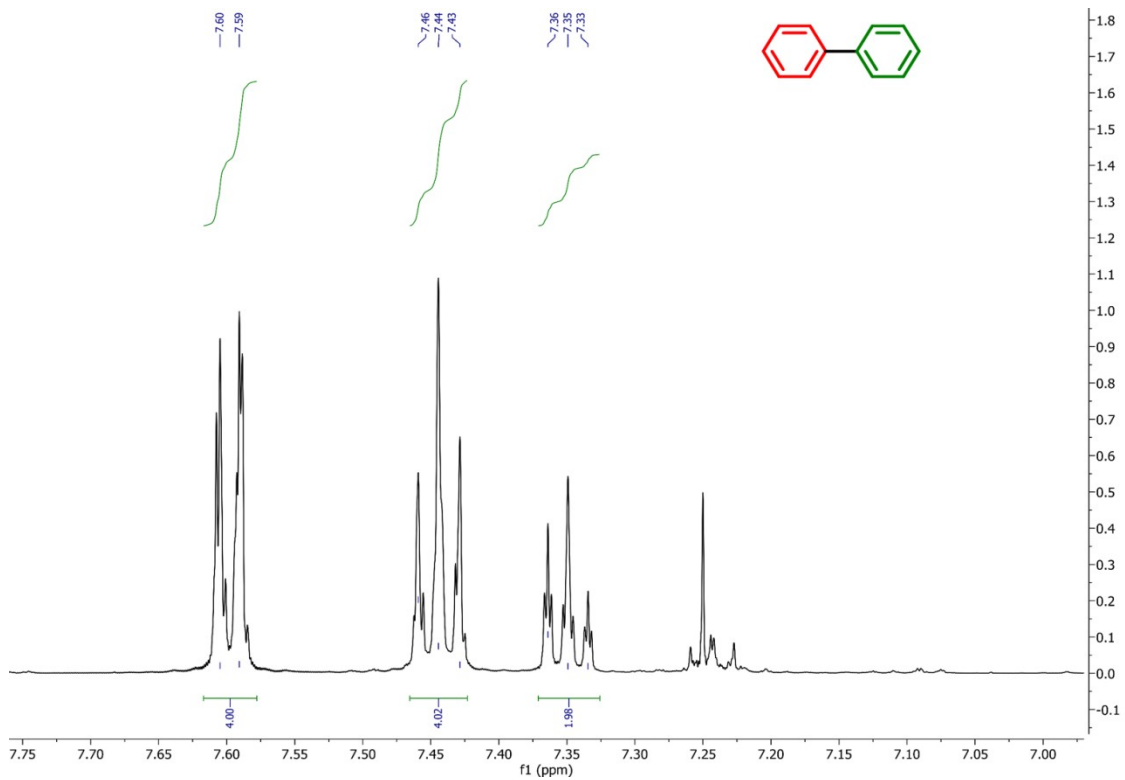

Fig S34. Zoomed view of  $^1\text{H}$  NMR spectrum of Biphenyl



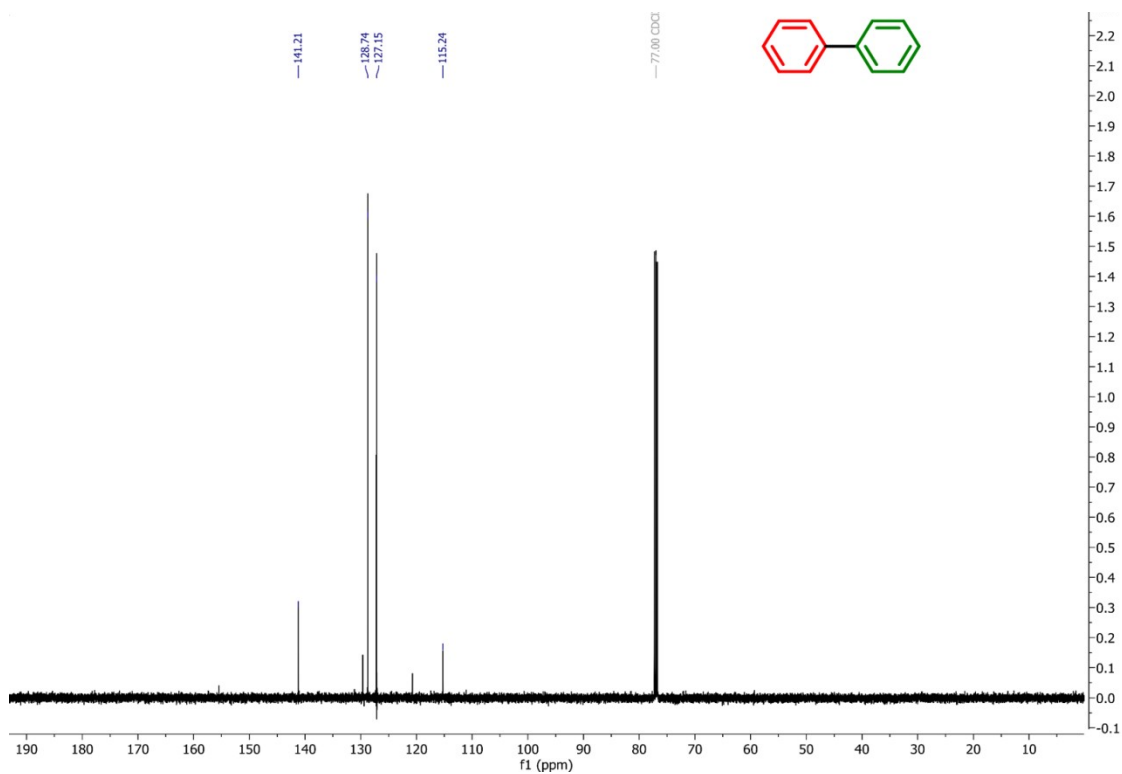

Fig S35. <sup>13</sup>C NMR spectrum of biphenyl

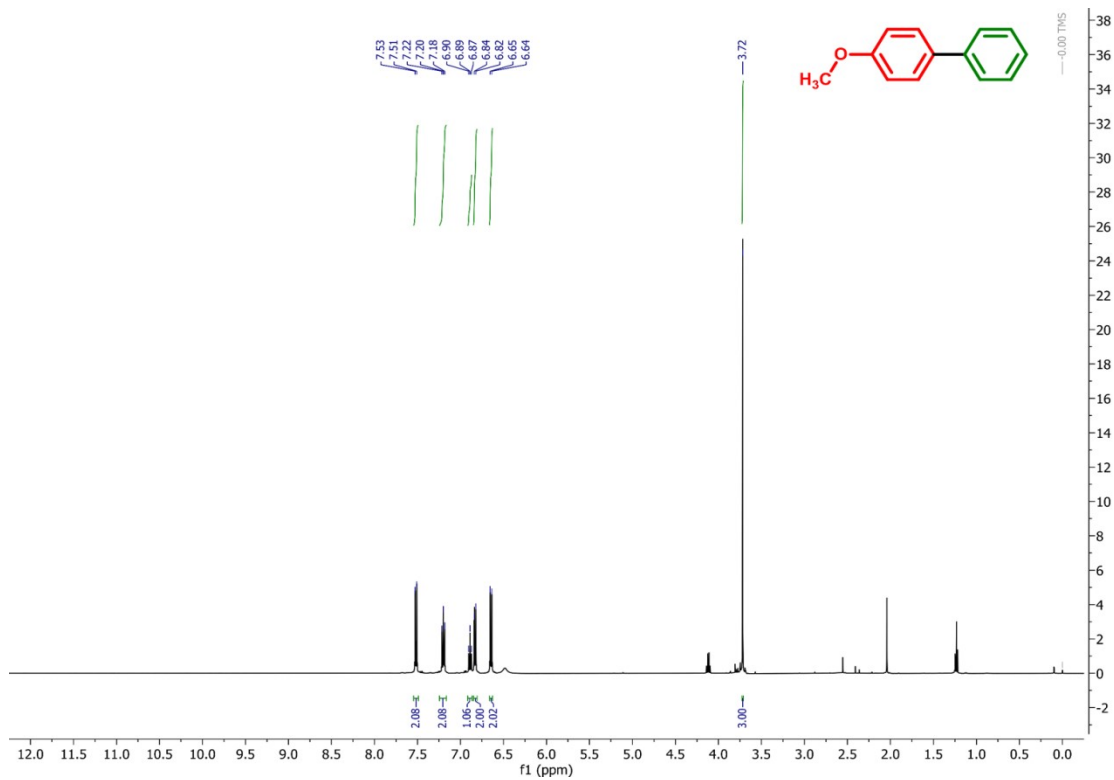

Fig S36. Full view of <sup>1</sup>H NMR spectrum of 4-methoxy-1,1'-biphenyl

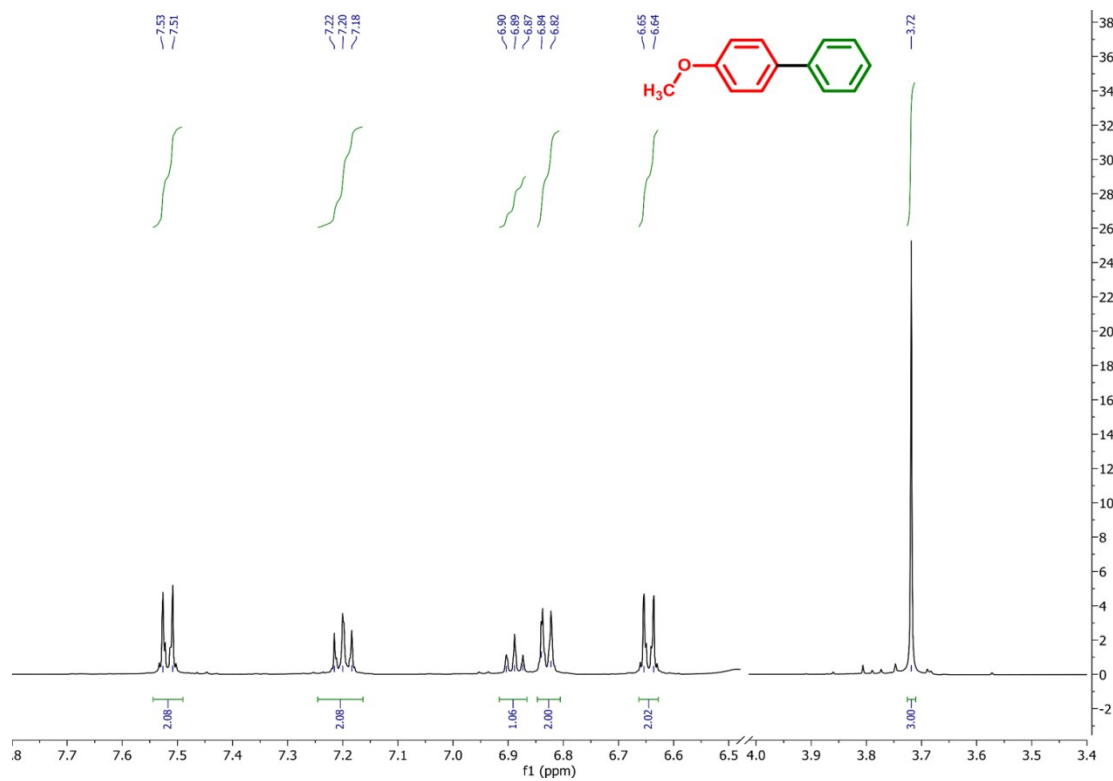

Fig S37. Zoomed view of <sup>1</sup>H NMR spectrum of 4-methoxy-1,1'-biphenyl

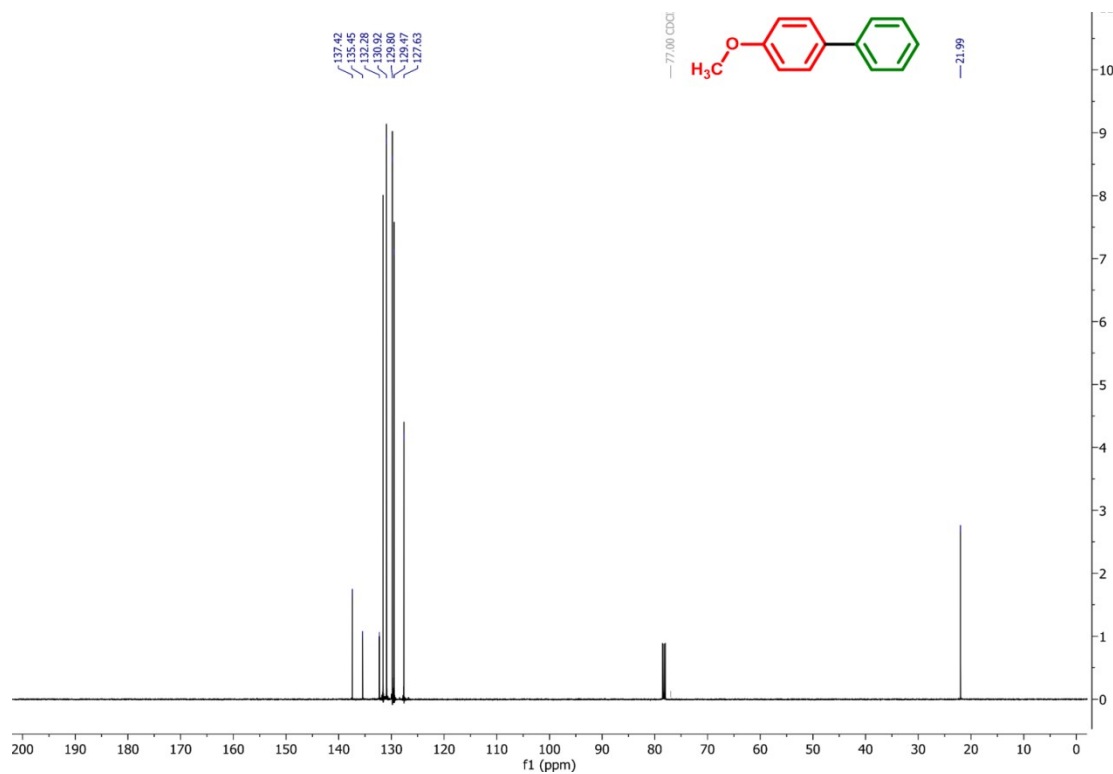

Fig S38. <sup>13</sup>C NMR spectrum of 4-methoxy-1,1'-biphenyl

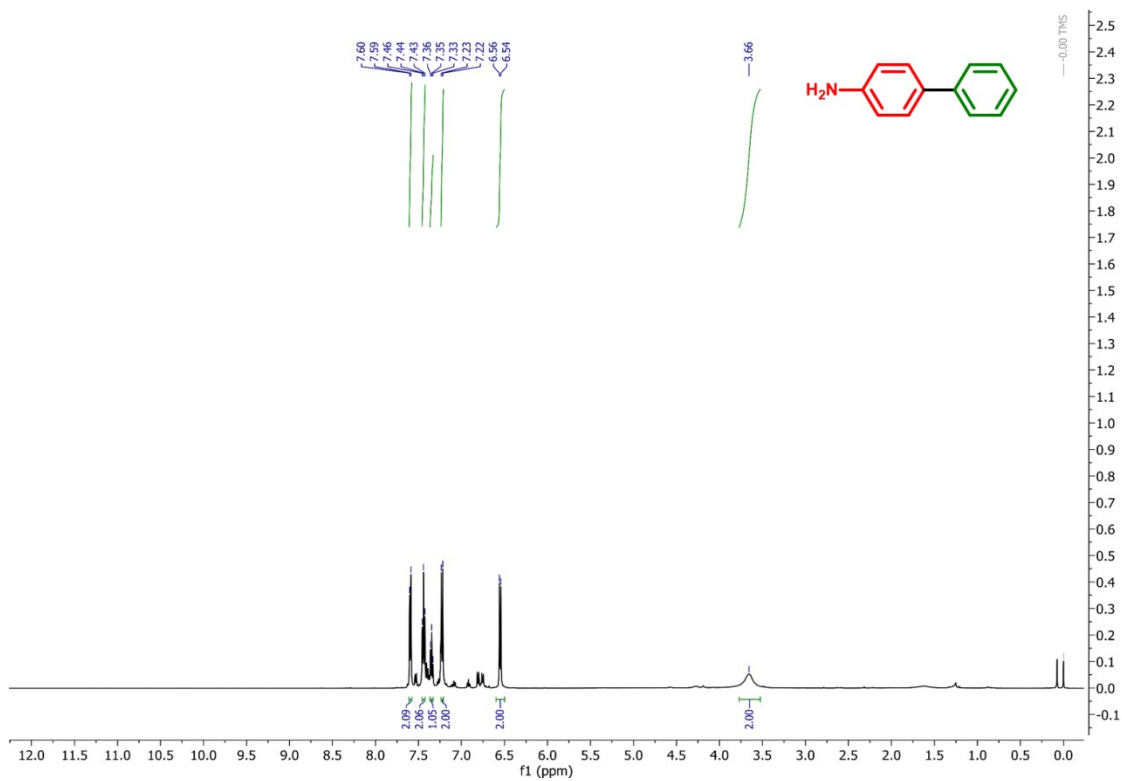

Fig S39. Full view of  $^1\text{H}$  NMR spectrum of [1,1'-biphenyl]-4-amine

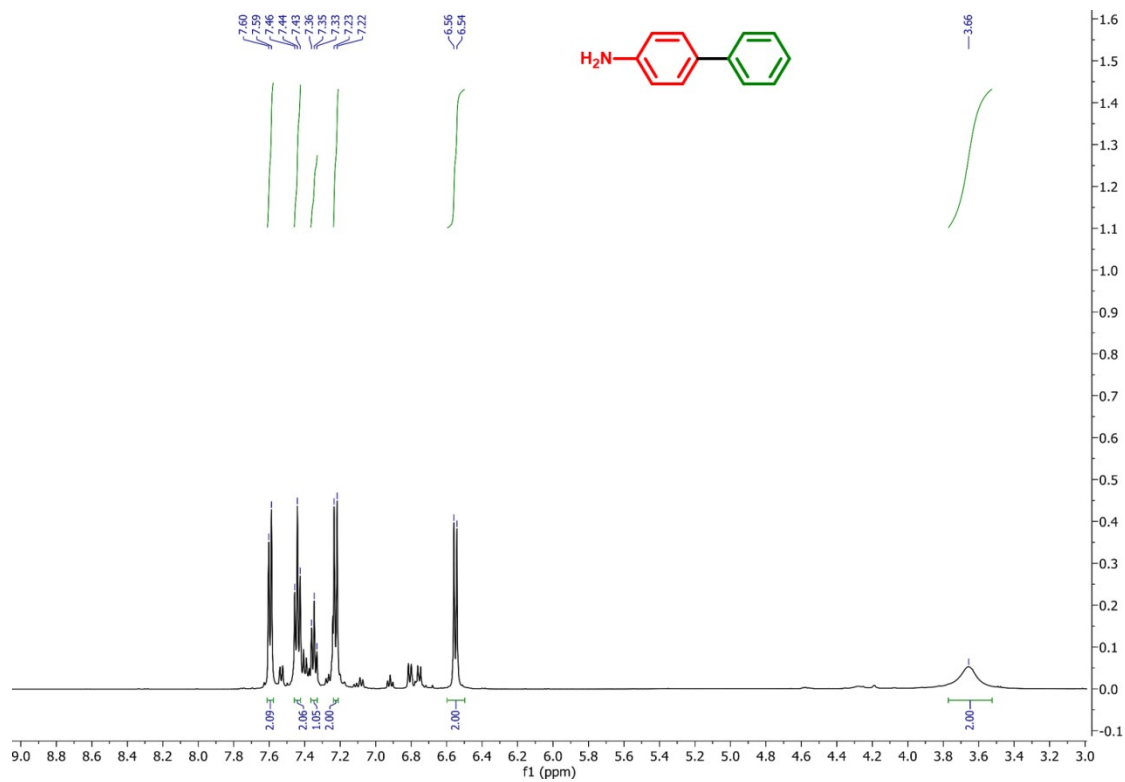

Fig S40. Zoomed view of  $^1\text{H}$  NMR spectrum of [1,1'-biphenyl]-4-amine

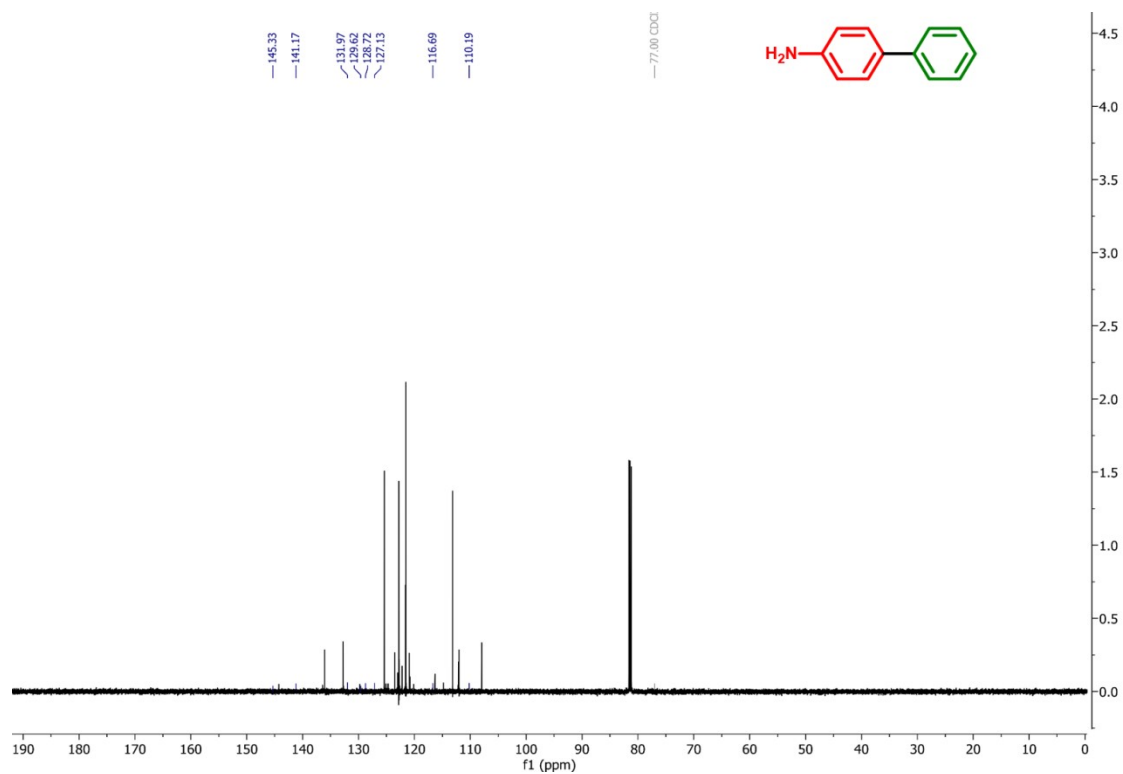

Fig S41. <sup>13</sup>C NMR spectrum of [1,1'-biphenyl]-4-amine

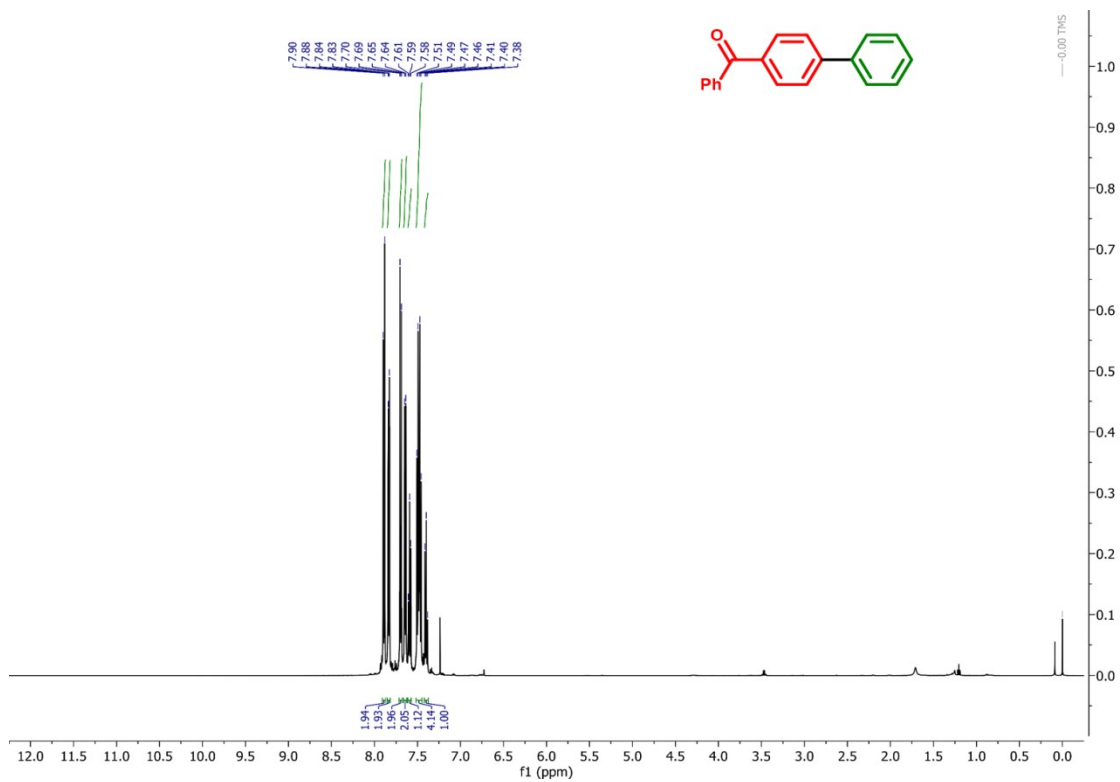

Fig S42. Full view of <sup>1</sup>H NMR spectrum of [1,1'-biphenyl]-4-yl(phenyl)methanone

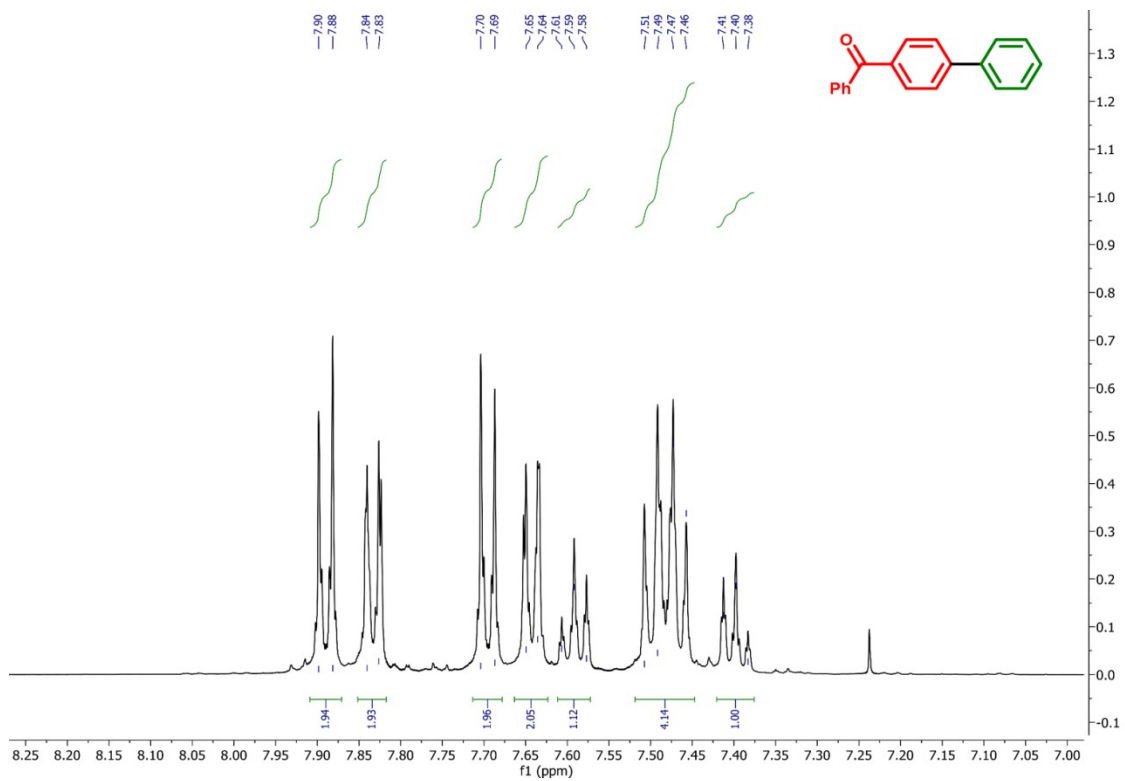

Fig S43. Zoomed view of <sup>1</sup>H NMR spectrum of [1,1'-biphenyl]-4-yl(phenyl)methanone

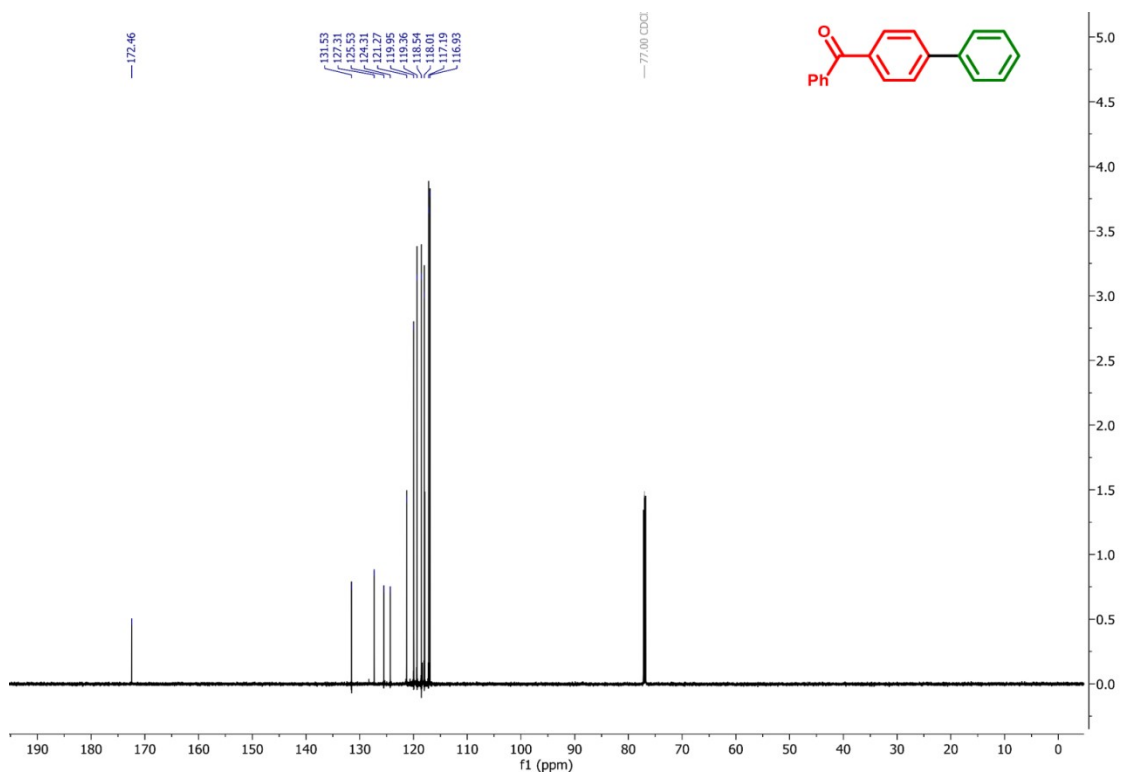

Fig S44. <sup>13</sup>C NMR spectrum of [1,1'-biphenyl]-4-yl(phenyl)methanone

## **<sup>1</sup>H-NMR data of *O*-arylated cross-coupled products (16-19) of C–O coupling reactions**

---

### **Compound 16: 1-Nitro-4-phenoxy benzene :<sup>1</sup>**

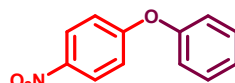

<sup>1</sup>H NMR (500 MHz, CDCl<sub>3</sub>, 25°C vs TMS), δ(ppm): 8.11-8.14 (d, 2H), 7.34-7.40 (t, 2H), 7.16-7.21 (t, 1H), 7.01-7.03 (d, 2H), 6.92-6.95 (d, 2H). <sup>13</sup>C-NMR (125 MHz, CDCl<sub>3</sub>): δ (ppm) 146.07, 139.09, 129.42, 119.62, 116.12, 115.71, 111.81, 109.01

---

### **Compound 17: 4-Phenoxybenzotrile :<sup>1</sup>**

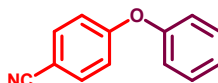

<sup>1</sup>H NMR (500 MHz, CDCl<sub>3</sub>), δ(ppm): 7.55 (d, 2H), 7.43 (t, 2H), 7.20 (t, 1H), 7.00 (d, 2H), 6.95 (d, 2H). <sup>13</sup>C-NMR (125 MHz, CDCl<sub>3</sub>): δ (ppm) 168.32, 154.74, 134.12, 131.88, 130.22, 128.95, 125.14, 120.41, 117.86

---

### **Compound 18: Diphenyl ether :<sup>1</sup>**

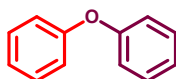

<sup>1</sup>H NMR (500 MHz, CDCl<sub>3</sub>), δ(ppm): 7.37 (d, 4H), 7.25 (t, 4H), 6.93 (t, 2H). <sup>13</sup>C-NMR (125 MHz, CDCl<sub>3</sub>): δ (ppm) 134.20, 129.68, 128.57, 126.39

---

### **Compound 19: 1-Methyl-4-phenoxybenzene :<sup>1</sup>**

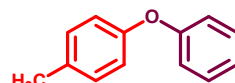

<sup>1</sup>H NMR (500 MHz, CDCl<sub>3</sub>, 25°C vs TMS), δ(ppm): 7.46-7.48 (m, 2H), 7.23-7.26 (t, 2H), 7.06-7.07 (m, 1H), 6.98-7.04 (m, 2H), 6.89-6.91 (m, 2H), 2.26 (s, 3H). <sup>13</sup>C-NMR (125 MHz, CDCl<sub>3</sub>): δ (ppm) 134.14, 134.18, 131.01, 130.31, 129.64, 128.53, 128.20, 126.36, 20.71

---

## NMR Spectra of C-O cross coupling products.

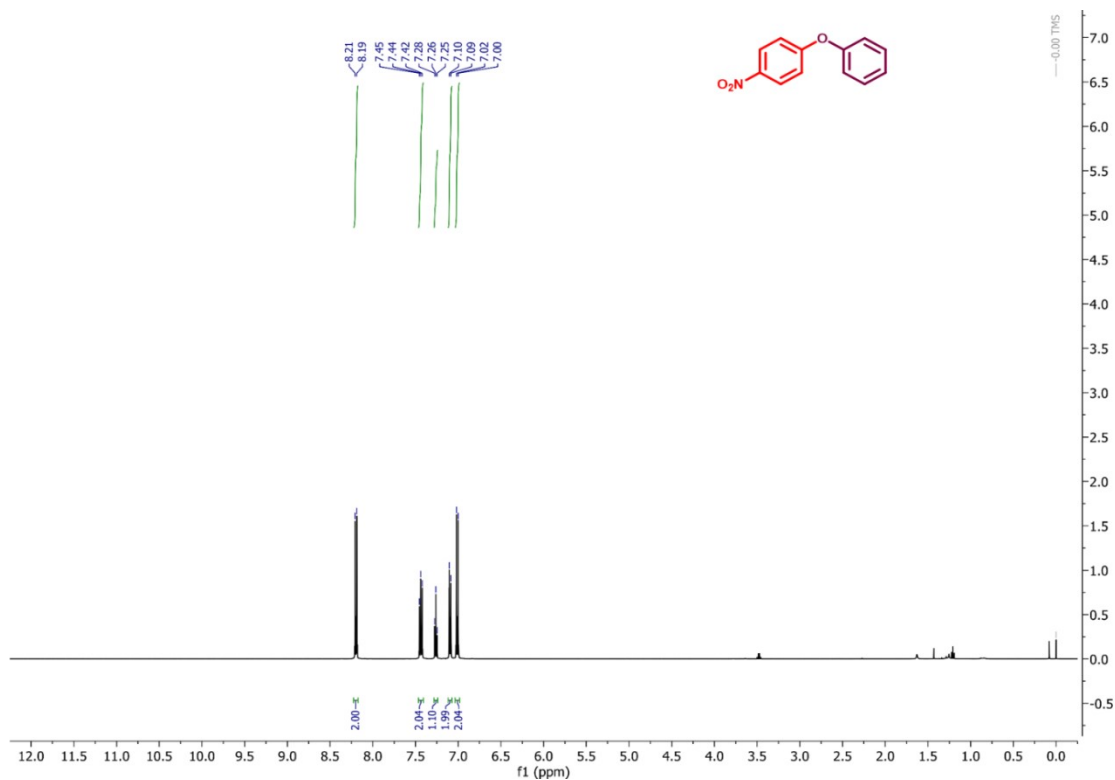

Fig. S45. Full view of <sup>1</sup>H NMR spectrum of 1-nitro-4-phenoxy benzene

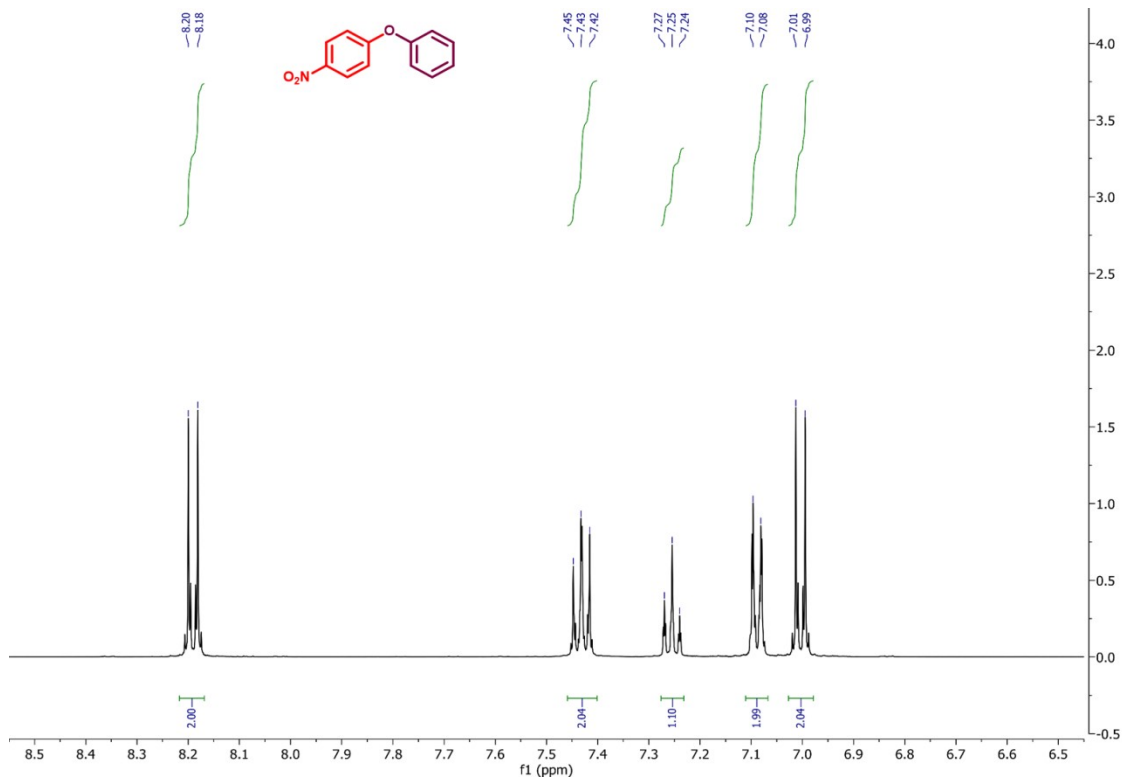

Fig. S46. Zoomed view of <sup>1</sup>H NMR spectrum of 1-nitro-4-phenoxy benzene

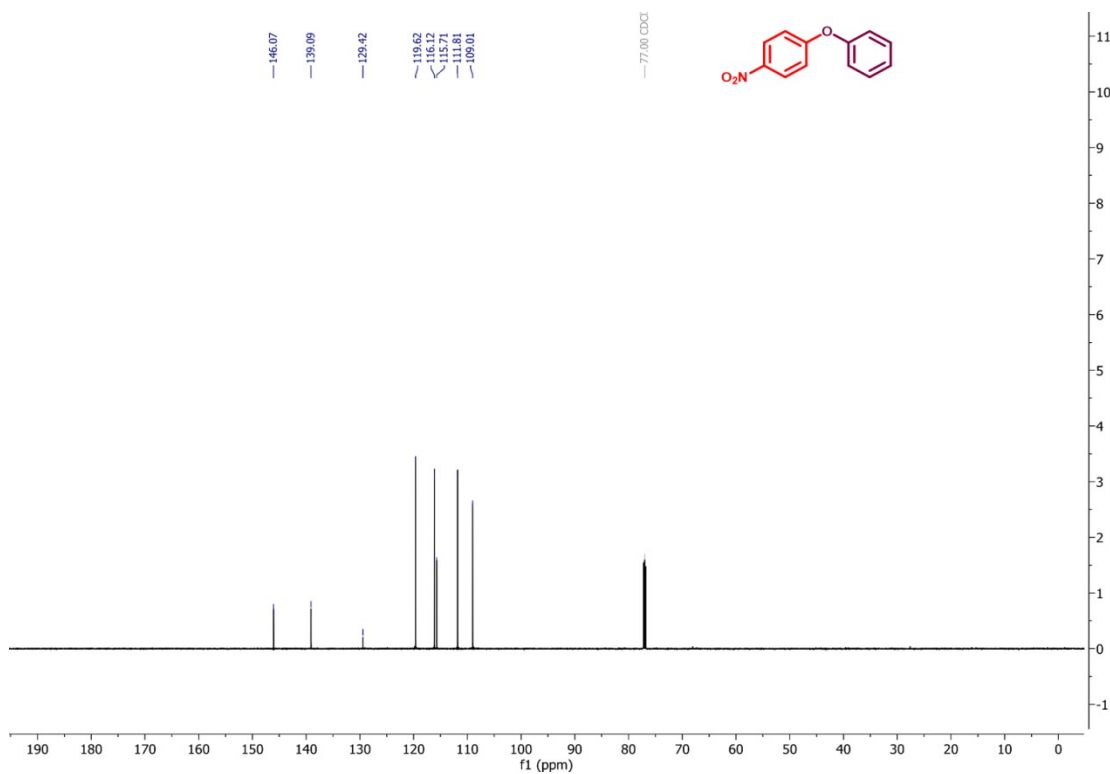

Fig. S47. <sup>13</sup>C NMR spectrum of 1-nitro-4-phenoxy benzene

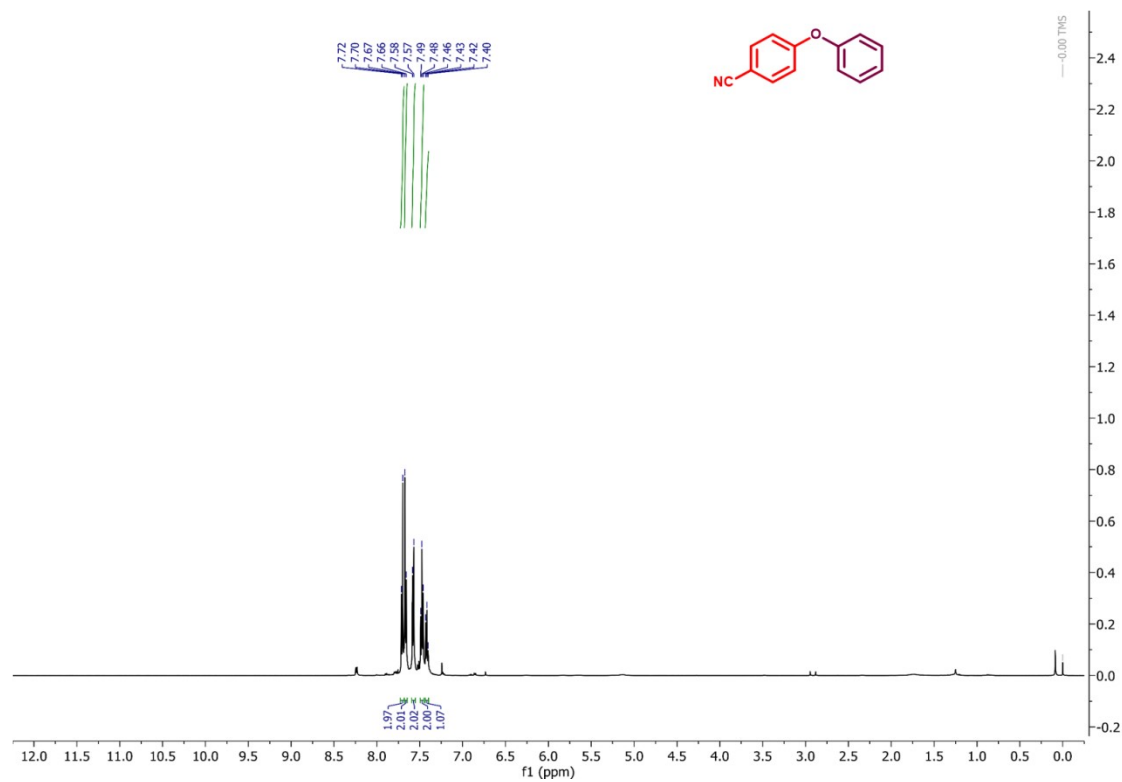

Fig. S48. Full view of <sup>1</sup>H NMR spectrum of 4-phenoxybenzotrile



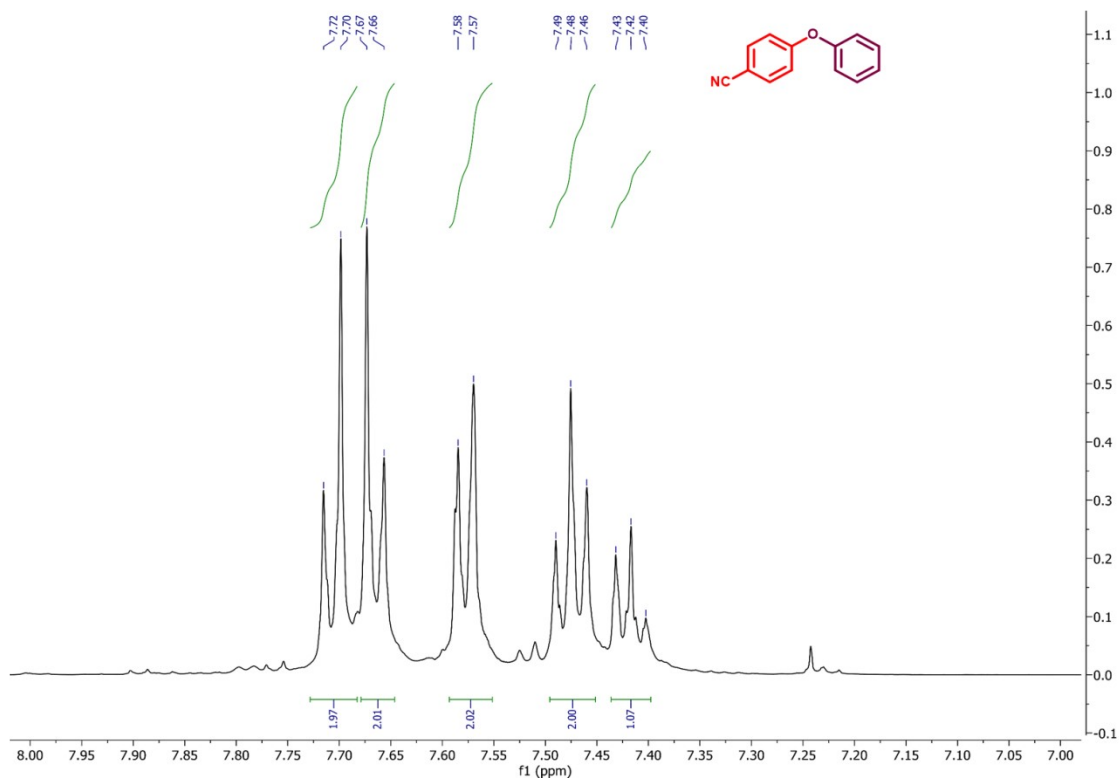

Fig. S49. Zoomed view of  $^1\text{H}$  NMR spectrum of 4-phenoxybenzonitrile

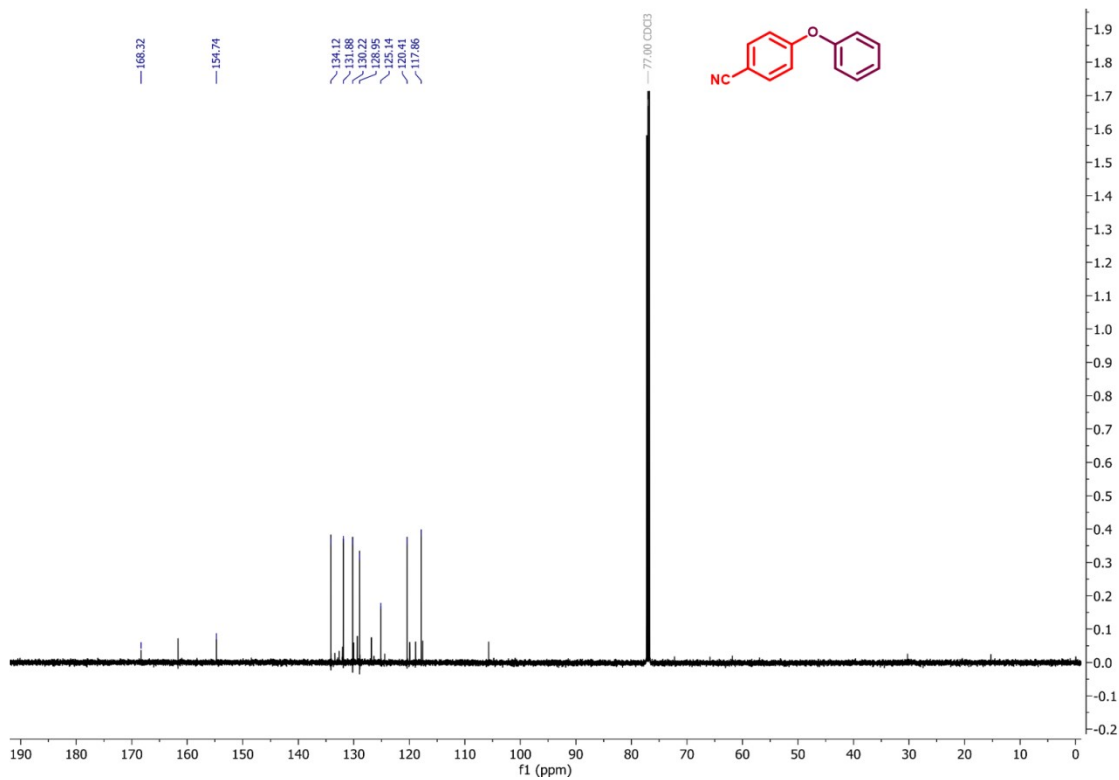

Fig. S50.  $^{13}\text{C}$  NMR spectrum of 4-phenoxybenzonitrile

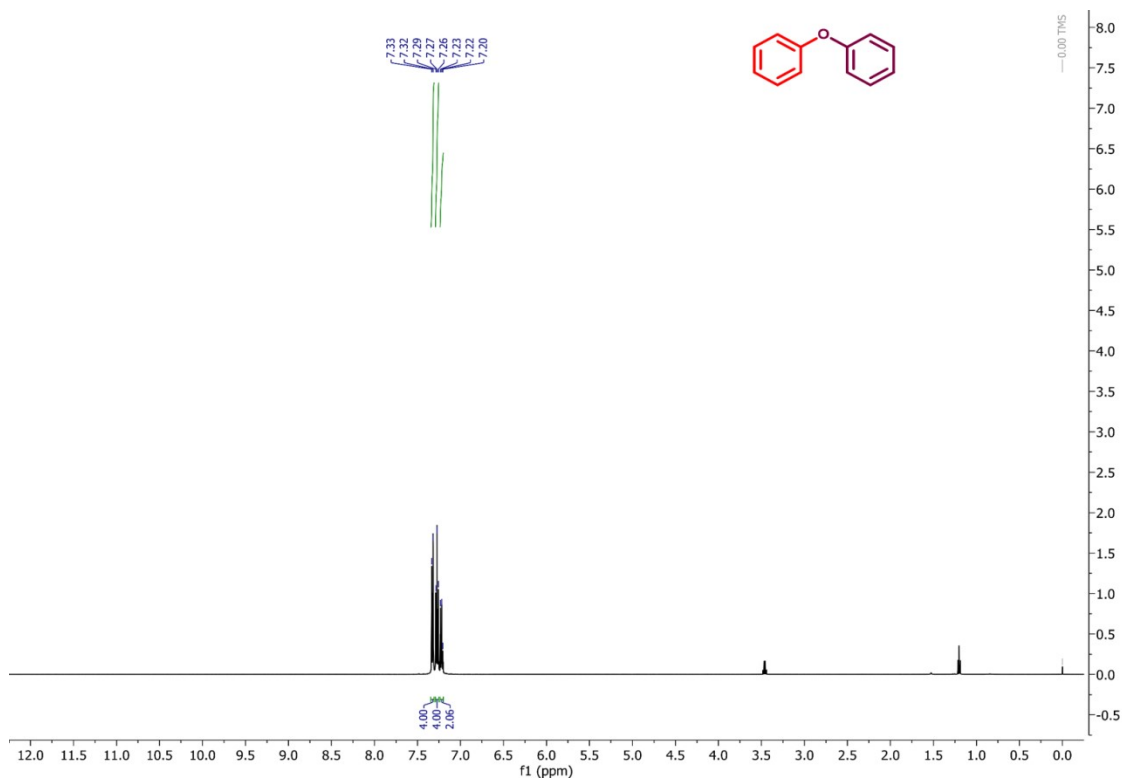

Fig. S51. Full view of  $^1\text{H}$  NMR spectrum of diphenyl ether

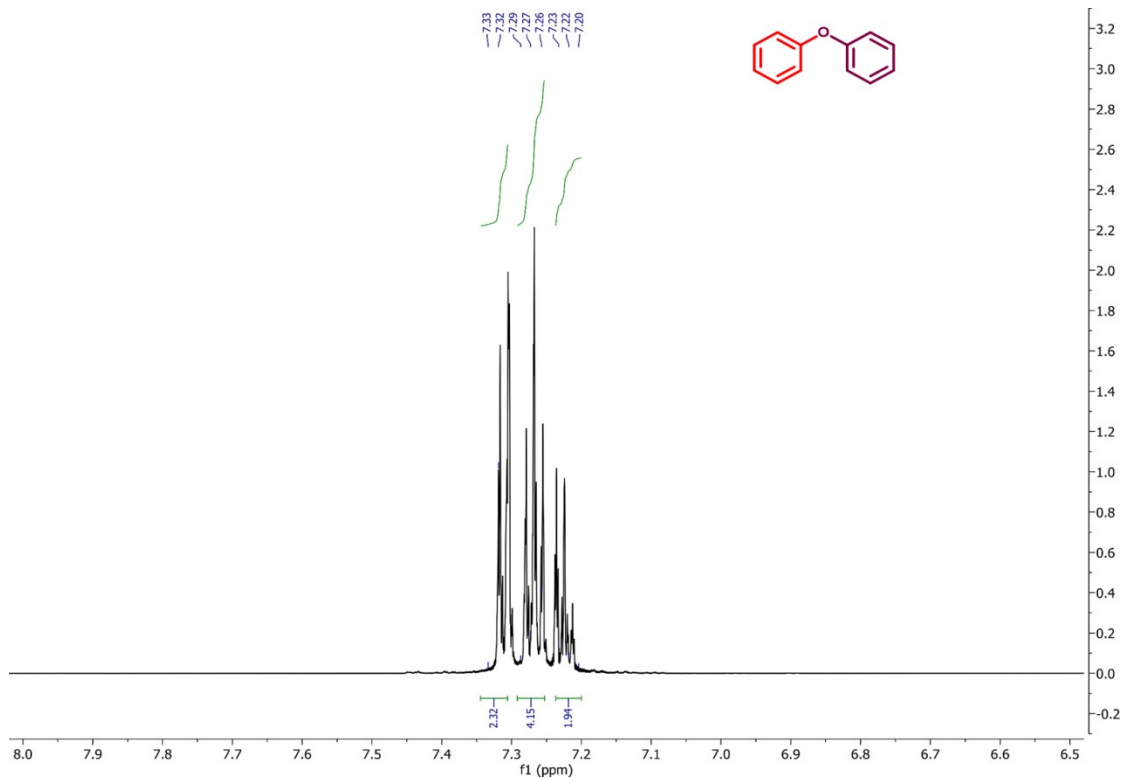

Fig. S52. Zoomed view of  $^1\text{H}$  NMR spectrum of diphenyl ether

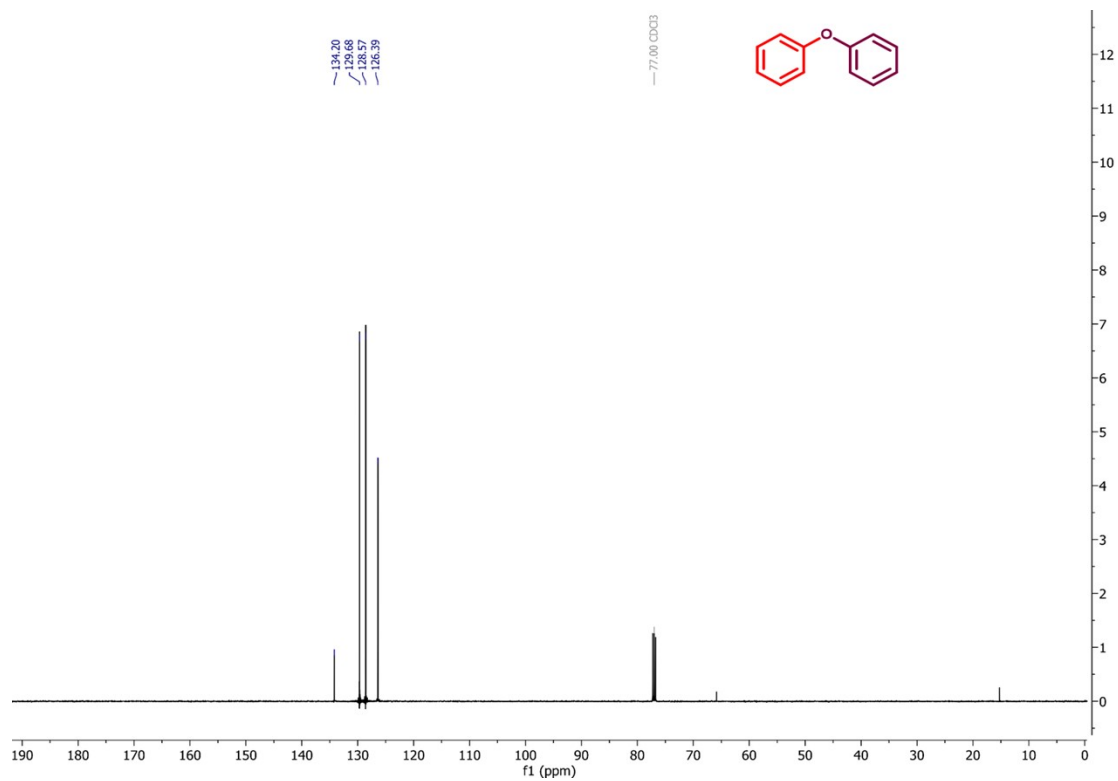

Fig. S53. <sup>13</sup>C NMR spectrum of diphenyl ether

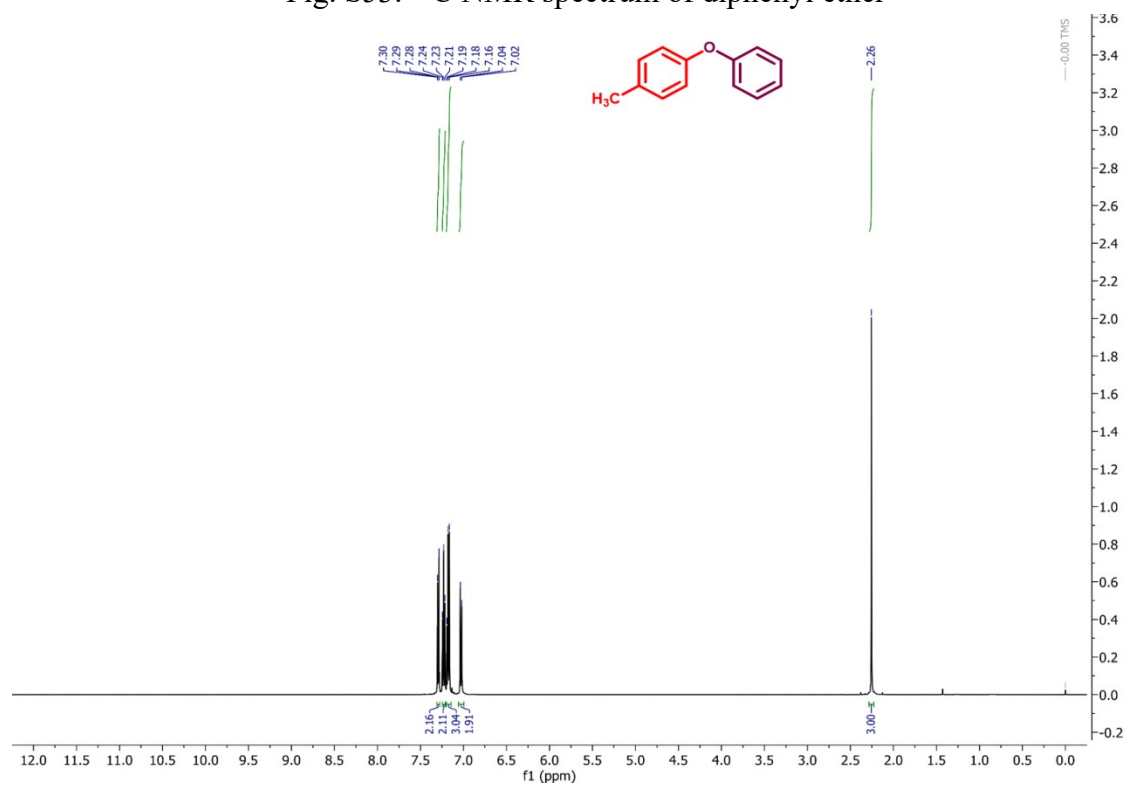

Fig. S54. Full view of <sup>1</sup>H NMR spectrum of 1-methyl-4-phenoxybenzene

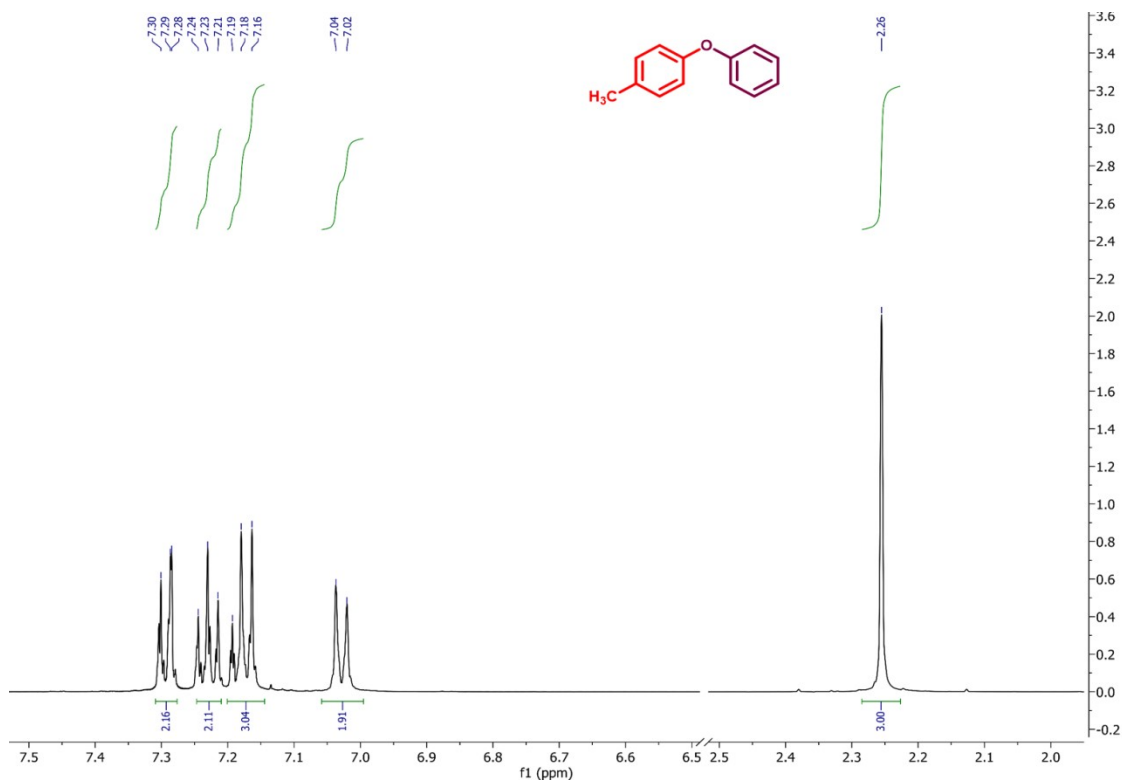

Fig. S55. Zoomed view of  $^1\text{H}$  NMR spectrum of 1-methyl-4-phenoxybenzene

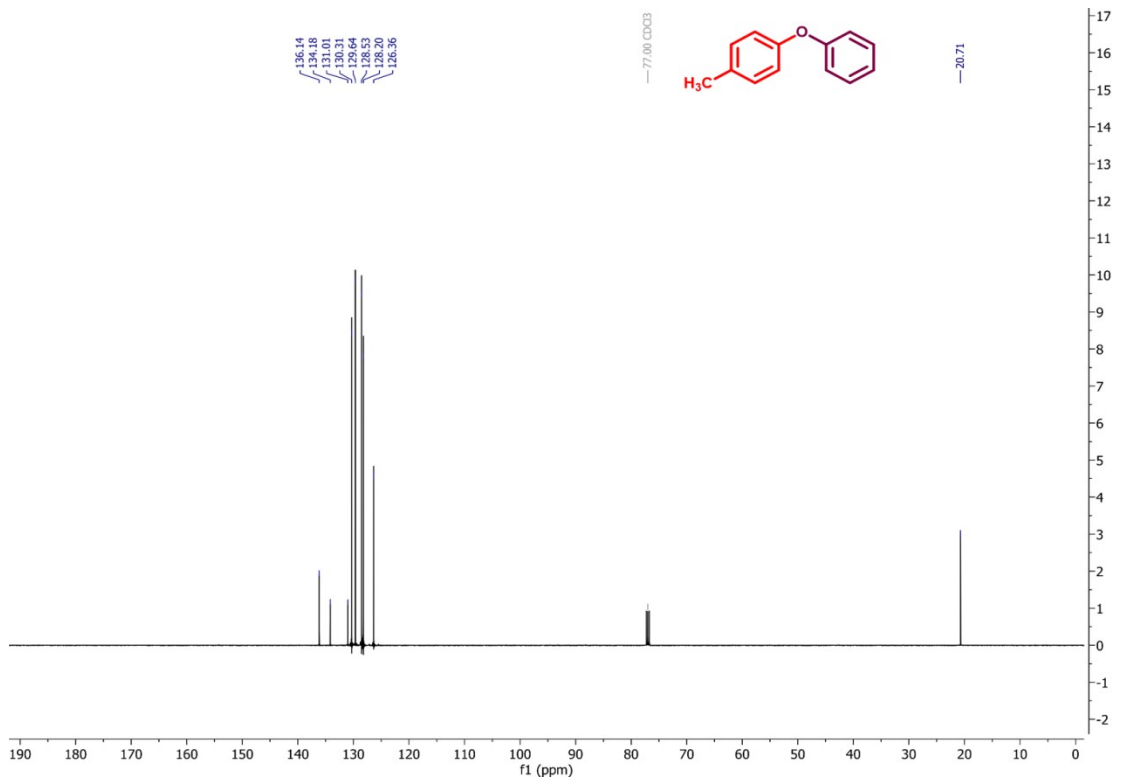

Fig. S56.  $^{13}\text{C}$  NMR spectrum of 1-methyl-4-phenoxybenzene

## References:

1. A. K. Sharma, H. Joshi, and A. K. Singh, *RSC Adv.*, 2020, **10**, 6452-6459.
2. P. Oswal, A. Arora, J. Kaushal, G. K. Rao, S. Kumar, A. K. Singh, and A. Kumar, *RSC Adv.*, 2019, **9**, 22313-22319.
